1 Title: Evaluation of nucleosome concentrations in healthy dogs and dogs with  
2 cancer

3  
4 Authors: Wilson-Robles H<sup>1\*</sup>, Miller T<sup>1</sup>, Jarvis J<sup>1</sup>, Terrell J<sup>2</sup>, Dewsbury N<sup>2</sup>, Kelly, T<sup>2</sup>,  
5 Herzog, M<sup>3</sup>, Bygott, T<sup>3</sup>, Hardat, N<sup>3</sup>, Michel, G<sup>3</sup>

6  
7 Affiliations:

8 <sup>1</sup> Texas A&M University, College of Veterinary Medicine, Small Animal Clinical  
9 Sciences Department, College Station, TX 77843.

10  
11 <sup>2</sup> Volition America & Volition Veterinary Diagnostic Development, 13215 Bee Cave  
12 Parkway, Galleria Oaks B, Suite 125 Austin, Texas, 78738

13  
14 <sup>3</sup> Belgian Volition SPRL, 22 Rue Phocas Lejeune, Parc Scientifique Crealys, 5032  
15 Isnes, Belgium

16  
17  
18 \*Corresponding Author

19  
20 Email address : [hwilson@cvm.tamu.edu](mailto:hwilson@cvm.tamu.edu) (HWR)

21  
22  
23  
24  
25  
26  
27  
28  
29  
30  
31  
32  
33  
34  
35  
36  
37  
38  
39  
40  
41  
42  
43  
44  
45

## 46 **Abstract**

47

48 Introduction: Nucleosomes consist of small fragments of DNA wrapped around a  
49 histone octamer core. Diseases such as cancer or inflammation lead to cell death,  
50 which causes fragmentation and release of nucleosomes into the blood. The Nu.Q™  
51 technology measures circulating nucleosome levels and exploits the different  
52 compositions of cancer derived nucleosomes in blood to detect and identify cancer  
53 even at early stages. The objectives of this study are to identify the optimal sample  
54 type for the Nu.Q™ H3.1 assay and to determine if it can accurately detect  
55 nucleosomes in the blood of healthy canines as well as those with cancer.

56 Materials and Methods: Blood samples from healthy canine volunteers as well as  
57 dogs newly diagnosed with lymphoma were used. The blood was processed at a  
58 variety of times under a variety of conditions to determine the most reliable sample  
59 type and conditions, and to develop an appropriate processing strategy to ensure  
60 reliably accurate results.

61 Results: Nucleosomes could be detected using a variety of sample collection and  
62 processing protocols. Nucleosome signals were highest in EDTA plasma and serum  
63 samples and most consistent in plasma. Samples should be processed within an  
64 hour of collection. Experiments showed that samples were able to withstand several  
65 freeze thaw cycles. Processing time and tcollection tube type did affect nucleosome  
66 detection levels. Finally, significantly elevated concentrations of nucleosomes were  
67 seen in a small cohort of dogs that had been newly diagnosed with lymphoma.

68 Conclusions: When samples are collected and processed appropriately, the Nu.Q™  
69 platform can reliably detect nucleosomes in the plasma of dogs. Further testing is  
70 underway to validate and optimize the Nu.Q™ platform for veterinary use.

71

72

73

74

75

76

77

78

79

80

81

82

83

84

## 85 **Introduction**

86 Nucleosomes are small fragments of chromosomes (1) that are composed of a 147  
87 bp segment of DNA wrapped around 4 core histones present in duplicate for a total  
88 of 8 histones. These core histones are highly conserved between eukaryotic species  
89 and are relatively invariant between lower species, such as yeast, and mammals,  
90 including humans (2, 3).

91 Nucleosomes have many functions in the cell. They provide the framework for  
92 chromatin assembly that is required for chromatin compaction, protect DNA from  
93 damaging agents and are critical for the stable repression of certain genes by  
94 restricting binding of transcription factors to DNA sequences. Nucleosomes alter  
95 their structure allowing for access to DNA during transcription, repair and DNA  
96 synthesis. Furthermore, nucleosomes act as a framework where a variety of  
97 epigenetic signals are laid(4). While nucleosomes are present in all mammalian  
98 cells, they can also be detected circulating in blood, where they are most commonly  
99 released by activated or dying white blood cells(5, 6). Large numbers of  
100 nucleosomes are released into the blood of humans and animals suffering from  
101 severe inflammation or trauma(7-9). These small cell free (cf) DNA molecules have  
102 been shown to have immunostimulatory roles that differ from that of free  
103 circulating histones or double stranded cell free DNA(ds-cfDNA)(10). The  
104 immunostimulatory effects of nucleosomes appear to be cell type dependent and  
105 may rely on specific surface markers such as DAMP high-mobility group box 1  
106 (HMGB1) or the receptor for advanced glycation end products (RAGE), and require  
107 apoptosis rather than necrosis for activation(10).

108 Elevated concentrations of nucleosomes have been identified in the blood of cancer  
109 patients. A study by Rasmussen et al (11) demonstrated that elevated nucleosome  
110 levels could be detected reliably. Nucleosomes have also been found to improve the  
111 detection of pancreatic cancer using serum when compared to the common blood  
112 marker, carbohydrate antigen 19-9 (CA 19-9) in a study published in 2015 (12) [2].  
113 Though there are no published studies specifically describing cancer detection using  
114 nucleosomes in dogs, several publications have described the utility of cfDNA (13-  
115 17).  
116 The current manuscript aims to define an optimized technique for isolating and  
117 analyzing this important cfDNA component and better understand circulating  
118 nucleosomes in healthy canines and using the Nu.Q™ H3.1 ELISA assay. This assay is  
119 the first of many developed to analyze nucleosomes in both humans and dogs. We  
120 further show that similar to humans, elevated nucleosome levels are present in  
121 canines with cancer compared to healthy controls.

## 122 **Materials and Methods**

123 Seven healthy dogs were recruited for up to 3 separate blood draws (AUP #2019-  
124 0211 CA). In order to be eligible dogs needed to be healthy, over 3 years of age,  
125 weigh more than 10 kg and not be pregnant. Dogs over the age of 3 were chosen as  
126 they best represent the target group of clinical cancer patients for which this assay  
127 has been developed. The dogs were a variety of breeds (pure bred dogs included 1  
128 Australian cattle dog, 1 Australian shepherd, the rest were mixed breed dogs) with 5  
129 spayed females and 2 neutered males. The dogs ranged in age from 4 years to 14  
130 years of age and all dogs had good body condition scores of 4-6 on a 9-point scale.

131 Not all dogs participated in every assay, but a minimum of 5 dogs were used in all  
132 assays.

133 The capture antibody for the Nu.Q™ H3.1 assay (Active Motif, Carlsbad, CA) was  
134 validated for use in canines using Mass Spectrometry by Spectrus Corp (Beverly,  
135 MA). Briefly, two plasma samples obtained from canines newly diagnosed with  
136 lymphoma were used. Baseline nucleosome concentrations were determined using  
137 the Nu.Q™ H3.1 ELISA assay following the manufacturer's directions (see below).  
138 Immunoprecipitation was performed on the samples using beads coated with the  
139 anti-H3.1 capture antibody. Samples were incubated with the beads at room  
140 temperature for 1 hour in a rotating mixer and separated with a magnet. Samples  
141 were washed twice with PBS and the assay buffer. The immunoprecipitated proteins  
142 were resuspended in the assay buffer and treated with 2 µg of trypsin overnight at  
143 37°C and boosted with another 2 µg of trypsin in the morning. The beads were  
144 removed with a magnet and the supernatant was acidified with TFA to a final  
145 concentration of 1% (v/v) and placed in HPLC vials for analysis.

146 All samples were tested using the Nu.Q™ H3.1 assay. This is an enzyme-linked  
147 immunosorbent assay (ELISA) with a capture antibody directed at histone 3.1 and  
148 nucleosome specific detection antibody (18). Assays were performed according to  
149 the manufacturer's instructions. Briefly, a standard curve was generated using the  
150 positive control stock (recombinant H3.1 nucleosomes) provided. The nucleosomes  
151 were bound to the detection antibody and the plates were washed 3 times using the  
152 provided 1x wash buffer. Twenty microliters of each undiluted sample were  
153 pipetted in duplicate into wells on the 96 well plates. Next, 90uL of the assay buffer

154 was added to each well. The plate was covered with sealing film and incubated on an  
155 orbital shaker for 2.5 hours at 700 rpm. Plates were then emptied and washed 3  
156 times using the 1x washing buffer. Next, 100 uL of the detection antibody was added  
157 to each well, the plate was resealed and incubated for 1.5 hours on the orbital  
158 shaker. The plates were then washed as described above. Streptavidin HRP  
159 conjugate was incubated for 30 min in each well and washed before applying the  
160 colorimetric substrate solution and incubating the plates in the dark for 20 min. A  
161 stop solution was added to the wells and the plates were read on a plate reader at  
162 405 nm (BioTek Synergy H1 plate reader, BioTek Instruments, Winooski, VT). The  
163 standard curve was linearized and fitted to a 5-parameter logistic curve using  
164 statistical software (Graphpad Software, version 8, San Diego, CA).

165 In order to determine how processing times affected nucleosome concentrations in  
166 canine blood samples, the first blood collection included 20 mL of blood from 6 dogs  
167 separated into EDTA plasma (lavender top) or serum tubes (red top) (Becton,  
168 Dickinson and Company, Franklin Lakes, NJ). Nine time points were evaluated from  
169 each sample type: time 0, 15 min, 30 min, 45 min, 1 hour, 2 hours, 4 hours, 8 hours  
170 and 24 hours. Samples were left at room temperature until their designated  
171 processing time. When processed, samples were centrifuged at room temperature at  
172 3000xg for 10 min. Serum or plasma was then immediately removed, placed in pre-  
173 labeled cryovials and frozen at -80°C to run in batches. All samples were run in  
174 duplicate.

175 To evaluate which type of plasma or serum sample gave the most reliable results, a  
176 second batch of 20 mL of blood was collected from the same 6 healthy volunteer

177 dogs 2 months after the first blood collection. This blood was separated into a  
178 simple serum tube (red top), a serum separator tube (yellow top), EDTA plasma  
179 (lavender top) and sodium citrate plasma (blue top) (Becton, Dickinson and  
180 Company, Franklin Lakes, NJ). Samples were processed at time 0, 30 minutes and 60  
181 minutes after the blood draw. These times were chosen based on the results of the  
182 first assay. Samples remained in their designated tubes at room temperature until  
183 their specified processing time. When processed, samples were centrifuged at room  
184 temperature at 3000xg for 10 min. Serum or plasma was then immediately  
185 removed, placed in pre-labeled cryovials and frozen at -80°C to run in batches. All  
186 samples were run in duplicate.

187 In order to determine if temporary storage conditions associated with different  
188 shipping methods can affect the concentration of nucleosomes, identically processed  
189 samples from 5 dogs (EDTA and citrate plasma) were packaged in a box either on  
190 ice or at room temperature and left on the counter overnight. Samples were  
191 processed 24 hours later using the Nu.Q™ H3.1 ELISA assay. Samples were run in  
192 duplicate and compared for possible differences.

193 In order to determine how multiple freeze thaw cycles affect nucleosome  
194 concentrations, an additional 15 mL of blood was collected from 7 healthy  
195 volunteers 2 months after the second sample collection and divided into three  
196 aliquots (one dog in the previous assay was replaced by a new dog and all dogs were  
197 available for this blood draw). The samples were centrifuged immediately at 3000xg  
198 for 10 min at room temperature and the plasma was divided into cryovials. Control  
199 (time 0) samples were analyzed immediately and the remaining sample was stored



200 at -80°C for future analysis. Frozen aliquots were thawed and refrozen up to 5 times  
201 analyzing the nucleosome concentrations in each sample at each freeze thaw cycle.  
202 All samples were run in duplicate.

203 An additional 3 mL of blood was taken from 6 healthy dog volunteers on two  
204 separate occasions. The first blood collection was performed while animals were  
205 fasted and the second after a meal. The samples were immediately centrifuged at  
206 room temperature at 3000xg for 10 min and the plasma was collected and stored at  
207 -80°C. Duplicate samples were analyzed in batches.

208 To determine the effects of processing times on cancer derived nucleosomes, 3 mL  
209 of blood was drawn from 13 client owned canines with lymphoma (AUP #-2017-  
210 0350). All patients were newly diagnosed and naïve to treatment. Following  
211 collection, samples were aliquoted into 5 tubes and processed immediately, at 30  
212 minutes, 1 hour, 2 hours and 24 hours after collection. Samples were kept at room  
213 temperature until the designated processing time. Samples were compared to the  
214 healthy dogs from Figure 2. After processing the plasma was collected and stored at  
215 -80°C until analyzed.

216 The optical density (OD) values determined by the ELISA for each sample were  
217 plotted against a standard curve of known nucleosome concentrations. All  
218 concentrations were interpolated using an asymmetric sigmoidal curve with a five-  
219 parameter logistic equation (5PL) where X=Concentration.

220 When evaluating the processing time points and the sample type, a correlation  
221 matrix was calculated containing the correlations between the results at each  
222 possible pair of time points. This was done using Pearson's correlation coefficient

223 using concentration values and Kendall's Tau coefficient, based on concordance  
224 between pairs. Both measures take values between -1 and 1. The results presented  
225 are the correlations between each time point and time zero. Both methods led to the  
226 same conclusion regarding the maximum time before centrifugation. To assess the  
227 question of whether there is a systematic bias over time, scatterplots were produced  
228 for each time point versus time zero and the differences tabulated. This part of the  
229 analysis was conducted using the statistical programming language R (R Core Team  
230 (2017). R: A language and environment for statistical computing. R Foundation for  
231 Statistical Computing, Vienna, Austria. URL <https://www.R-project.org>). Graphs  
232 were produced using ggplot2 (H. Wickham. ggplot2: Elegant Graphics for Data  
233 Analysis. Springer-Verlag New York, 2016).

234 For data sets containing only two conditions, such as the evaluation of storage of  
235 samples at room temperature or on ice or fasting versus fed conditions a Wilcoxon  
236 signed rank test was used to compare the medians of the data sets. For data sets  
237 where multiple conditions were compared, such as the multiple freeze thaw cycles  
238 and the lymphoma versus healthy cases, a two-way ANOVA for repeat measures  
239 with a Tukey's multiple comparisons test was performed. This part of the analysis  
240 was performed using GraphPad Prism version 8.0.0 for Macintosh, GraphPad  
241 Software, San Diego, California USA, [www.graphpad.com](http://www.graphpad.com).

## 242 **Results**

243 The Nu.Q™ H3.1 Assay is specific for canine nucleosomes.  
244 A total of 339 proteins were identified during the mass spectrometry analysis  
245 between two samples, including peptides for H3.1 and other histone proteins .

246 Baseline nucleosome concentrations in plasma were 960 ng/mL and 480 ng/mL and  
247 70 ng/mL and 40 ng/mL after immunoprecipitation resulting in 93% and 91%  
248 nucleosome depletion in each sample, respectively.

249 Optimal sample processing times vary depending on the sample type used.  
250 Consistent with what has been observed for human samples (data not shown) we  
251 found that serum samples were far more variable than plasma. There were large  
252 variations in nucleosome concentrations even within 15 min in at least half of the  
253 dogs' serum samples (Table 1, Fig 1). The time point with the least amount of  
254 variation when compared to time 0 was 120 minutes after collection with a  
255 Pearson's correlation coefficient of 0.90. The second highest correlation timepoint  
256 was at a processing time of 30 min. The largest difference in serum nucleosome  
257 levels was seen at 24 hours with mean and median percent differences of 50% and  
258 25.8%, respectively. The majority of plasma samples had stable nucleosome levels  
259 as long as they were processed within 60 min of collection (Table 2, Fig 2). The  
260 highest mean nucleosome concentrations were recorded for most dogs at times 0, 8  
261 hours and 24 hours. The largest percent changes seen in nucleosome concentrations  
262 when compared to time 0 were between 4-24 hours with mean percent changes  
263 ranging from -20.1-45.6% and median percent changes ranging from -43.3-65.8%.

264 The Pearson's correlation coefficients showed much higher consistency than serum,  
265 being at 0.96 or above for the 15 min, 30 min and 60 min time points (Table 2, Fig  
266 2B). To check for systematic bias, a series of scatterplots were produced comparing  
267 each time point for both serum and plasma readings to the time zero readings. The

268 data in Table 3 and Figure 3 show no consistent systematic bias in plasma. Similar  
269 results were seen in serum (data not shown).

270

271 **Figure 1. Nucleosome concentrations in canine serum.** A. Median nucleosome  
272 concentrations (ng/mL) in serum for all dogs. There is a noticeable amount of  
273 variation after 15 minutes in nearly all dogs with the exception of dogs 1 and 2  
274 whose nucleosome concentrations did not change appreciably at any time point. B.  
275 Graphical representation of the Pearson's correlation coefficients for this data set.  
276 There was very little correlation over time between the serum samples.

277

278 **Table 1: Correlation between each time point and time zero, demonstrating**  
279 **the variation in serum nucleosome concentrations.**

280

| <b>Processing time</b> | <b>Pearson's Correlation</b> | <b>Kendall's Tau</b> |
|------------------------|------------------------------|----------------------|
| <b>Time 0</b>          | <b>1.00</b>                  | <b>1.00</b>          |
| <b>15 min</b>          | <b>0.29</b>                  | <b>0.20</b>          |
| <b>30 min</b>          | <b>0.88</b>                  | <b>0.60</b>          |
| <b>45 min</b>          | <b>0.42</b>                  | <b>0.40</b>          |
| <b>60 min</b>          | <b>0.80</b>                  | <b>0.40</b>          |
| <b>120 min</b>         | <b>0.90</b>                  | <b>0.80</b>          |
| <b>4 hours</b>         | <b>0.68</b>                  | <b>0.40</b>          |
| <b>8 hours</b>         | <b>0.14</b>                  | <b>0.40</b>          |
| <b>24 hours</b>        | <b>0.70</b>                  | <b>0.40</b>          |

281

282

283 **Figure 2. Median nucleosome concentrations in canine plasma.** A. Median  
284 plasma concentrations (ng/mL) in all dogs over time. With the exception of Dog 3,  
285 most dogs have very stable nucleosome concentrations for the first 60 minutes  
286 before processing. B. Graphical representation of the Pearson's correlation  
287 coefficients of all plasma data point for the 6 dogs. There is much better correlation  
288 of the samples to time 0 control in this data set.

289

290 **Table 2: Correlation between each time point and time zero, demonstrating**  
291 **the variation in plasma nucleosome concentrations.**

292 Both measures of correlation remain high until 60 minutes and then reduce for  
293 longer processing times.

294

| <b>Processing time</b> | <b>Pearson's Correlation</b> | <b>Kendall's Tau</b> |
|------------------------|------------------------------|----------------------|
| <b>Time 0</b>          | <b>1.00</b>                  | <b>1.00</b>          |
| <b>15 min</b>          | <b>0.98</b>                  | <b>0.80</b>          |
| <b>30 min</b>          | <b>0.98</b>                  | <b>0.80</b>          |
| <b>45 min</b>          | <b>0.96</b>                  | <b>0.80</b>          |
| <b>60 min</b>          | <b>0.96</b>                  | <b>0.80</b>          |
| <b>120 min</b>         | <b>0.79</b>                  | <b>0.60</b>          |
| <b>4 hours</b>         | <b>0.77</b>                  | <b>0.60</b>          |
| <b>8 hours</b>         | <b>0.46</b>                  | <b>0.20</b>          |
| <b>24 hours</b>        | <b>0.65</b>                  | <b>0.20</b>          |

295

296

297 **Figure 3. Scatterplots of nucleosome concentrations in canine plasma.** A. After  
298 processing time of 15 minutes compared to time zero. B 60 minutes compared to  
299 time zero.

300

301 **Table 3. Changes in plasma measurements compared to time zero.**

|                | ng/mL        | Percentage difference from time 0 |             |             |             |             |
|----------------|--------------|-----------------------------------|-------------|-------------|-------------|-------------|
|                | Time 0       | 15 min                            | 30 min      | 45 min      | 60 min      | 2 hours     |
| <b>Dog1</b>    | <b>11.3</b>  | <b>-69%</b>                       | <b>-84%</b> | <b>18%</b>  | <b>-39%</b> | <b>-88%</b> |
| <b>Dog2</b>    | <b>123.5</b> | <b>37%</b>                        | <b>7%</b>   | <b>26%</b>  | <b>-66%</b> | <b>-82%</b> |
| <b>Dog3</b>    | <b>424.0</b> | <b>1%</b>                         | <b>38%</b>  | <b>49%</b>  | <b>60%</b>  | <b>25%</b>  |
| <b>Dog4</b>    | <b>80.2</b>  | <b>-23%</b>                       | <b>-34%</b> | <b>-39%</b> | <b>-27%</b> | <b>292%</b> |
| <b>Dog5</b>    | <b>123.7</b> | <b>-23%</b>                       | <b>-29%</b> | <b>-21%</b> | <b>-3%</b>  | <b>-14%</b> |
| <b>Dog6</b>    | <b>385.1</b> | <b>9%</b>                         | <b>10%</b>  | <b>0%</b>   | <b>7%</b>   | <b>3%</b>   |
| <b>Average</b> | <b>191.3</b> | <b>-11%</b>                       | <b>-15%</b> | <b>5%</b>   | <b>-11%</b> | <b>22%</b>  |

302

303 Plasma provides more stable nucleosome concentrations than serum.

304 A total of 4 sample types were tested with a variety of processing times up to 1 hour  
305 after collection. Extended processing times were not evaluated due to the wide  
306 variability seen in the previous experiment. Plasma provided the most consistent  
307 nucleosome concentrations between samples and there was no difference in the  
308 consistency of the sample type over time between the citrate and EDTA plasma  
309 samples. The serum red top tubes, which contain no additives, were the most  
310 variable of the serum samples (Fig 4), though there was no statistically significant  
311 difference between the time points for any of the serum samples.

312

313 **Figure 4: Consistency of nucleosome levels between various sample types.**

314 Median nucleosome concentrations in serum (A & B) and plasma (C & D) samples

315 from 6 healthy canine volunteers. Plasma samples had more consistent nucleosome  
316 concentrations than serum samples. Red top tube and EDTA tube samples  
317 contained higher nucleosome concentrations than SST and citrate tubes when  
318 comparing samples from the same dogs.

319

320 Short-term storage at room temperature or on ice does not significantly affect  
321 nucleosome concentrations. Plasma samples (EDTA and sodium citrate) were  
322 evaluated using the Nu.Q™ H3.1 assay after being packaged for shipping either at  
323 room temperature or on ice overnight. The median concentration of the EDTA  
324 samples stored at room temperature was 112.8 ng/mL and for those stored on ice  
325 was 76.35 ng/mL. The two were not statistically different ( $p = 0.0625$ ). The mean  
326 nucleosome concentration in the citrate plasma samples stored at room  
327 temperature was 74.1 ng/mL and for those on stored on ice was 23.53  $\mu\text{g/mL}$  (Fig  
328 5). These two sets of samples were also not statistically different ( $p = 0.125$ ) either,  
329 however, in all sample types, those stored on ice had values that were more  
330 consistent with the time 0 concentrations for these sample times seen in Fig 4.

331

332 **Figure 5: Effects of short-term storage on nucleosome concentrations.** Though  
333 median nucleosome concentrations (ng/mL) were consistently higher when kept at  
334 room temperature overnight, there was no significant difference between the two  
335 conditions.

336

337 Nucleosome concentrations are not significantly affected by multiple freeze/thaw  
338 cycles.  
339 Duplicate samples from 7 healthy canine volunteers were evaluated after 5 freeze-  
340 thaw (FT) cycles to determine if repeated freeze-thaw cycles would affect the  
341 nucleosome concentrations in the plasma. The mean nucleosome concentrations for  
342 all dogs are reported in Table 4. There were no significant differences noted  
343 between any of the cycles, though mean concentrations were routinely higher in FT  
344 cycle 1 for all dogs. Four of the 6 dogs had very stable nucleosome concentrations (<  
345 50 ng/mL change) during all of the freeze thaw cycles. However, samples from dogs  
346 3 and 4 had a noticeable decrease in nucleosome concentration at the 3<sup>rd</sup> or 4<sup>th</sup> FT  
347 cycle (Fig 6).

348

349 **Figure 6: Effects of freeze/thaw cycles on nucleosome concentrations.** Mean  
350 nucleosome concentrations (ng/mL) at each freeze thaw cycle for all dogs. There  
351 was very little change (<50 ng/mL) in mean nucleosome levels for 5 of 7 dogs.  
352 However, dogs 3 and 4 did display more variability between samples.

353

354 **Table 4. Mean concentrations (ng/mL) of nucleosomes in EDTA plasma after 5**  
355 **freeze thaw cycles.** P values were calculated comparing additional freeze thaw  
356 cycles to the first freeze thaw cycle.

|                | <b>FT 1</b> | <b>FT 2</b> | <b>FT 3</b> | <b>FT 4</b> | <b>FT 5</b> |
|----------------|-------------|-------------|-------------|-------------|-------------|
| <b>Mean</b>    | 67.19       | 60.38       | 51.98       | 56.57       | 58.47       |
| <b>SD</b>      | 37.68       | 55.33       | 54.81       | 38.78       | 41.69       |
| <b>SEM</b>     | 14.24       | 20.91       | 20.72       | 15.83       | 17.02       |
| <b>P value</b> |             | 0.8898      | 0.5315      | 0.1624      | 0.2860      |



357

358 Fasting significantly affect mean nucleosome concentrations.

359 Six canine volunteers were either fasted for 10-12 hours or fed within 2 hours

360 before blood collections. Samples were analyzed and the medians for all dogs were

361 compared. The median concentration of nucleosomes for all dogs fasted was 65.5

362 ng/mL (range 3.0 -788.0 ng/mL) and for all dogs after feeding was 62.75 ng/mL

363 (range 1.0- 1191.0) (p= 0.0312). When individual dogs were compared, there was a

364 noticeable difference between fasting and fed samples for dogs 2 and 3. Both of

365 these dogs had noticeably higher nucleosome concentrations in plasma after eating

366 (Fig 6). Given the small numbers of dogs in this group and the wide variability in

367 nucleosome concentrations seen, a larger study with additional dogs is be needed in

368 order to understand the impact of feeding on circulating nucleosome levels.

369

370 **Figure 7: Effects of fasting on nucleosome concentrations.** A. Median

371 nucleosome levels (ng/mL) for all dogs after a meal or after  $\geq 10$  hours fasting. The

372 fasting samples were significantly lower than the fed samples. B. Mean nucleosome

373 levels (ng/mL) in each individual dog after a meal or after  $\geq 10$  hours of fasting.

374

375 Nucleosome concentrations are stable at a variety of processing times in dogs with

376 lymphoma.

377 Thirteen dogs with newly diagnosed lymphoma (12 multicentric lymphoblastic

378 lymphomas and 1 indolent T cell lymphoma) were recruited for this cohort. EDTA

379 plasma samples were processed over a variety of time points and analyzed for

380 median nucleosome concentrations. There was no significant difference between  
381 the mean or median concentrations for this group at any of the processing time  
382 points. The mean nucleosome concentrations at time 0, 30 min, 60 min, 120 min and  
383 24 hours were 661.2 ng/mL, 640.9 ng/mL, 638.8 ng/mL, 702.3 ng/mL and 537.1  
384 ng/mL respectively (Fig 8, Table 6). Nucleosome concentrations in lymphoma  
385 samples (median 590 ng/mL for all dogs at all timepoints) were significantly higher  
386 at all time points than age matched healthy control dogs (median 116.5 ng/mL for  
387 all dogs at all time points) with a p value of 0.0079 (Fig 7).

388

389 **Figure 8: Stability of cancer-associated nucleosomes in dogs with lymphoma.**

390 Mean nucleosome concentrations from 6 healthy dogs (as pictured in Figure 2) and  
391 13 dogs newly diagnosed with lymphoma. The 6 healthy dogs were not fasted  
392 whereas the dogs with lymphoma were; however, there is still a significant  
393 elevation in median nucleosome concentrations at all time points for the dogs with  
394 lymphoma.

395

396 **Table 6: Mean nucleosome concentrations (ng/mL) for samples processed at a**  
397 **variety of times with SD and SEM for 13 dogs newly diagnosed with lymphoma.**

|                           | <b>Time 0</b> | <b>30 min</b> | <b>60 min</b> | <b>120 min</b> | <b>24 hours</b> |
|---------------------------|---------------|---------------|---------------|----------------|-----------------|
| <b>Mean</b>               | 661.2         | 640.9         | 638.8         | 702.3          | 537.1           |
| <b>Std. Deviation</b>     | 841.9         | 855.7         | 863.7         | 882.9          | 683.1           |
| <b>Std. Error of Mean</b> | 233.5         | 237.3         | 239.5         | 244.9          | 189.4           |
| <b>Percent Change</b>     |               | 3.1%          | 3.4%          | 5.9%           | 19.8%           |

398

399 **Discussion**

400 Nucleosomes contain DNA wrapped around an octamer containing histone sub-  
401 units, H3, H4, H2A and H2B. H3 has two main variants, H3.1 and H3.3(19). We  
402 targeted the H3.1 subunit and expected the H3.1 antibody would bind the canine  
403 histone protein due to the high degree of homology between the two species  
404 (>96%). We were also able to identify all four histone units in the  
405 immunoprecipitated protein samples from the two dogs with lymphoma suggesting  
406 that we were able to isolate entire nucleosomes rather than individual histones in  
407 the plasma. The depletion of nucleosomes in the two samples after  
408 immunoprecipitation demonstrates the high affinity of the antibody for the canine  
409 histone. Elevated concentrations of nucleosomes have previously been identified in  
410 dogs with a variety of diseases including sepsis, trauma, septic peritonitis and  
411 immune mediated hemolytic anemia; however, to the authors' knowledge this is the  
412 first time the nucleosome concentrations have been defined in healthy dogs or dogs  
413 with cancer (7-9, 20, 21). In general, the concentration of circulating nucleosomes in  
414 healthy dogs is low with medians ranging from 40-100 ng/mL. This is significantly  
415 lower than the concentration seen in the dogs with lymphoma reported in this study  
416 with median of 590 ng/mL. Comparisons between the concentrations of  
417 nucleosomes reported here and those in other reports of inflammation and control  
418 groups are difficult due to the fact that nucleosome concentrations have previously  
419 been reported only in arbitrary units (7-9, 20-22).

420 When evaluating nucleosome concentrations in plasma and serum at a variety of  
421 processing times plasma is more stable than serum. This finding is in agreement  
422 with findings reported by Goggs, 2019. Based on the results reported here, optimal

423 processing times for plasma are within 60 minutes of collection, though processing  
424 within 30 minutes of collection are ideal. The optimal processing time for serum  
425 samples was set at 15 minutes, however, as these samples are much less forgiving  
426 with significant alterations in serum nucleosome concentrations noted after  
427 samples sat at room temperature for 45 minutes or longer, it is highly  
428 recommended that plasma is used to measure nucleosome concentrations.  
429 There was no statistical difference between the EDTA and citrate plasma samples.  
430 Given that the samples used for this portion of the study are all from healthy dogs, it  
431 is expected that they will have relatively low concentrations of nucleosomes.  
432 Nucleosomes in healthy dogs are primarily released by white blood cells as they  
433 become activated or as they die. Plasma contains factors that serum does not such as  
434 clotting factors and vitamins, which may contribute to the stability of the white  
435 blood cells in the plasma samples when compared to serum(23, 24). Additionally,  
436 both EDTA and sodium citrate bind calcium as a means of preventing coagulation.  
437 However, calcium also plays an integral role in the activation of white blood  
438 cells(25). The lack of free calcium in plasma tubes may contribute to lower  
439 concentrations of nucleosomes in these sample types. Additionally, both EDTA and  
440 sodium citrate inhibit DNase activity at fairly low concentrations (1, 26), which may  
441 also add to the stability of nucleosome concentrations within these samples.  
442 Interestingly, the serum separator tubes had significantly lower nucleosome  
443 concentrations than serum from the no additive red top tubes. This may be related  
444 to the physical separation of the serum from the white blood cells during and after  
445 centrifugation. Even more interesting is the fact that the mean nucleosome

446 concentration from the sodium citrate tubes was about 1/3 of the mean nucleosome  
447 concentration in the EDTA tubes. One explanation of this may be that EDTA is a  
448 much more efficient calcium chelator than citrate requiring 1/5 of the molar  
449 concentration to prevent gross coagulation(27). Because of this, microplatelet  
450 clumps form within citrate plasma due to low level platelet activation in sodium  
451 citrate tubes(27). It is possible that nucleosomes are binding or becoming  
452 entrapped in the microplatelet clumps within these tubes, lowering the number of  
453 free nucleosomes available for antibody binding within the samples.  
454 Though there was slightly less variability in the citrate plasma samples, the higher  
455 concentrations of nucleosomes in EDTA makes this sample type more desirable.  
456 Either plasma sample was determined to be superior to serum and an effective way  
457 to repeatedly measure nucleosome concentrations in dogs. Given the high  
458 prevalence of EDTA tubes in general veterinary practice compared to sodium citrate  
459 tubes and the presumed enhanced capture of nucleosomes in EDTA plasma, the  
460 determination was made to use plasma (EDTA plasma with or without citrate  
461 plasma) for the majority of the assays moving forward.  
462 Taken together, based on these results, it was determined that collecting samples in  
463 EDTA tubes and plasma isolation is the optimal method for evaluating nucleosomes  
464 in canine patients, furthermore, this is consistent with sample collection  
465 recommendations for humans.  
466 The ability to ship samples enables collection to occur at individual veterinary  
467 offices, from which they can be sent to a centralized location for testing and analysis.  
468 Thus, we evaluated whether shipping the samples on ice changed the nucleosome

469 concentrations in either EDTA or citrate plasma. In both cases those samples  
470 shipped on ice had less variability and lower nucleosome concentrations than those  
471 stored at room temperature. These lower concentrations were more in line with  
472 time 0 nucleosome concentrations in the first two assays. Given that these samples  
473 were collected from the same dogs (paired samples from the same tube were stored  
474 either on ice or at room temperature) and that they had been centrifuged in the  
475 same tube before these paired aliquots were prepared, it is not possible for the  
476 room temperature samples to truly have higher nucleosome concentrations than  
477 samples stored on ice, rather it more likely that there is a minor temperature  
478 associated conformational change that enables better access of the antibody to the  
479 nucleosome. These differences were not statistically significant and this finding is  
480 not specific to our study as increased levels of DNA have been seen in biobank  
481 samples after long term storage as a result of protein disassociation allowing more  
482 DNA to be available for PCR amplification(28). Thus, to ensure the most accurate  
483 results are generated it is recommended that samples be shipped on ice as these  
484 concentrations were most similar to time 0 nucleosome concentrations in other  
485 assays.

486 Nucleosomes are fairly stable in plasma after centrifugation. In these plasma  
487 samples, nucleosome concentrations were fairly stable after 3 freeze thaw cycles,  
488 with a noticeable decrease in nucleosome concentrations occurring in 2 of 6  
489 samples by the 4<sup>th</sup> freeze/thaw cycle. The process of freezing and thawing has been  
490 shown to degrade protein and DNA and has even been published as a method of  
491 buffer free protein isolation from exosomes and other cell free DNA components

492 (29). However, samples may be safely be used and refrozen 2-3 times before the  
493 quality of the sample is compromised.

494 Interestingly, samples collected from fasting dogs had more consistent  
495 concentrations of nucleosomes for nearly all of the dogs and a greater variation in  
496 nucleosome concentration was seen after dogs were fed. Studies have shown that  
497 folic acid supplementation can affect the DNA methylation profile in mice, however,  
498 to date, no studies have been performed to determine if diet can alter the  
499 nucleosome content in mammals(30). A high body mass index has been associated  
500 with elevated concentrations of circulating nucleosomes in humans (22, 31),  
501 however, no studies examining the effect of fasting on circulating nucleosome  
502 concentrations could be found in any species. Given this variability, it is  
503 recommended that any future samples drawn for dogs be fasting samples to limit  
504 the amount of variation seen.

505 Several of the groups analyzed in this manuscript were quite small which may have  
506 under or over-estimated differences between the groups. Additional animals should  
507 be compared to further validate some of the changes seen in the different  
508 processing and handling variables.

509 Finally, nucleosome concentrations were evaluated in client owned dogs presenting  
510 with naïve lymphoma and compared to the healthy dogs used in earlier assays  
511 within this study. All dogs diagnosed with lymphoma were fasted as part of our  
512 standard clinical recommendation for new patients. The samples collected from  
513 healthy dogs and assayed over a variety of time points were not all fasted samples.  
514 There was no significant difference detected in nucleosome concentrations for the

515 dogs with lymphoma across any of the time points, however, there was a significant  
516 difference between the mean nucleosome concentrations from the dogs with  
517 lymphoma when compared to the healthy controls. Of the 13 dogs with lymphoma,  
518 only one had a mean nucleosome concentration that was similar to that seen in the  
519 control group (mean of this one dog was 23 ng/mL). The other 12 dogs had means  
520 that were much higher than what was found in the healthy control population.  
521 Elevated concentrations of cfDNA have been reported in dogs with cancer, however,  
522 this is the first time, to the authors' knowledge, that elevated nucleosome  
523 concentrations have specifically been reported in dogs with cancer(13, 32, 33).  
524 Though this initial finding is promising, the small number of cases and use of only  
525 one type of cancer in this population, warrants further investigation before  
526 determining the utility of plasma nucleosome concentrations as a diagnostic or  
527 prognostic tool in veterinary oncology.

## 528 **Conclusions**

529 Very little is known about nucleosomes in the cfDNA compartment in healthy or ill  
530 canines. The data presented here provides a better understanding of what this  
531 compartment typically looks like in healthy dogs and how simple variables, such as  
532 feeding or processing time can significantly alter the plasma nucleosome  
533 concentration in dogs. Regarding sample optimization for further analysis in healthy  
534 or ill dogs, the authors recommend using plasma rather than serum from fasted  
535 patients whenever possible. It is also important to process those samples within 60  
536 minutes of collection (ideally 30 min whenever possible). If shipping these samples,  
537 it is recommended that samples ship over ice for the most consistent nucleosome



538 concentrations. Regarding nucleosome concentrations in cancer patients, this  
539 preliminary work suggests that nucleosome concentrations may be elevated in  
540 some patients with cancer. Additional work is needed to determine the utility of  
541 measuring circulating nucleosome concentrations as a diagnostic or prognostic tool.

542

## 543 **Acknowledgements :**

544

545 The authors would like to acknowledge Spectrus Corporation, especially Dr. Michael  
546 Ziebell, for their work validating the H3.1 detection antibody for use in canines as  
547 well as the Fred and Vola Palmer Chair in Comparative Oncology for funding  
548 support of this work.

550

551

552

553

554

555

556

## 557 **References**

- 558 1. Barra GB, Santa Rita TH, de Almeida Vasques J, Chianca CF, Nery LF, Santana  
559 Soares Costa S. EDTA-mediated inhibition of DNases protects circulating cell-free  
560 DNA from ex vivo degradation in blood samples. *Clin Biochem.* 2015;48(15):976-81.
- 561 2. Luger K, Mäder AW, Richmond RK, Sargent DF, Richmond TJ. Crystal  
562 structure of the nucleosome core particle at 2.8 Å resolution. *Nature.*  
563 1997;389(6648):251-60.
- 564 3. White CL, Suto RK, Luger K. Structure of the yeast nucleosome core particle  
565 reveals fundamental changes in internucleosome interactions. *EMBO J.*  
566 2001;20(18):5207-18.
- 567 4. Cutter AR, Hayes JJ. A brief review of nucleosome structure. *FEBS Lett.*  
568 2015;589(20 Pt A):2914-22.

- 569 5. Snyder MW, Kircher M, Hill AJ, Daza RM, Shendure J. Cell-free DNA Comprises  
570 an In Vivo Nucleosome Footprint that Informs Its Tissues-Of-Origin. *Cell*.  
571 2016;164(1-2):57-68.
- 572 6. Lui YY, Chik KW, Chiu RW, Ho CY, Lam CW, Lo YM. Predominant  
573 hematopoietic origin of cell-free DNA in plasma and serum after sex-mismatched  
574 bone marrow transplantation. *Clin Chem*. 2002;48(3):421-7.
- 575 7. Letendre JA, Goggs R. Determining prognosis in canine sepsis by bedside  
576 measurement of cell-free DNA and nucleosomes. *J Vet Emerg Crit Care (San*  
577 *Antonio)*. 2018;28(6):503-11.
- 578 8. Letendre JA, Goggs R. Concentrations of Plasma Nucleosomes but Not Cell-  
579 Free DNA Are Prognostic in Dogs Following Trauma. *Front Vet Sci*. 2018;5:180.
- 580 9. Martiny P, Goggs R. Biomarker Guided Diagnosis of Septic Peritonitis in Dogs.  
581 *Front Vet Sci*. 2019;6:208.
- 582 10. Marsman G, Zeerleder S, Luken BM. Extracellular histones, cell-free DNA, or  
583 nucleosomes: differences in immunostimulation. *Cell Death Dis*. 2016;7(12):e2518.
- 584 11. Rasmussen L, Christensen IJ, Herzog M, Micallef J, Nielsen HJ, Cancer  
585 DCGoEDoC. Circulating cell-free nucleosomes as biomarkers for early detection of  
586 colorectal cancer. *Oncotarget*. 2018;9(12):10247-58.
- 587 12. Bauden M, Pamart D, Ansari D, Herzog M, Eccleston M, Micallef J, et al.  
588 Circulating nucleosomes as epigenetic biomarkers in pancreatic cancer. *Clin*  
589 *Epigenetics*. 2015;7:106.
- 590 13. Beffagna G, Sammarco A, Bedin C, Romualdi C, Mainenti M, Mollo A, et al.  
591 Circulating Cell-Free DNA in Dogs with Mammary Tumors: Short and Long  
592 Fragments and Integrity Index. *PLoS One*. 2017;12(1):e0169454.
- 593 14. Burnett DL, Cave NJ, Gedye KR, Bridges JP. Investigation of cell-free DNA in  
594 canine plasma and its relation to disease. *Vet Q*. 2016;36(3):122-9.
- 595 15. Lee KH, Shin TJ, Kim WH, Cho JY. Methylation of LINE-1 in cell-free DNA  
596 serves as a liquid biopsy biomarker for human breast cancers and dog mammary  
597 tumors. *Sci Rep*. 2019;9(1):175.
- 598 16. Brady JV, Troyer RM, Ramsey SA, Leeper H, Yang L, Maier CS, et al. A  
599 Preliminary Proteomic Investigation of Circulating Exosomes and Discovery of  
600 Biomarkers Associated with the Progression of Osteosarcoma in a Clinical Model of  
601 Spontaneous Disease. *Transl Oncol*. 2018;11(5):1137-46.
- 602 17. Troyer RM, Ruby CE, Goodall CP, Yang L, Maier CS, Albarqi HA, et al.  
603 Exosomes from Osteosarcoma and normal osteoblast differ in proteomic cargo and  
604 immunomodulatory effects on T cells. *Exp Cell Res*. 2017;358(2):369-76.
- 605 18. Arimura Y, Ikura M, Fujita R, Noda M, Kobayashi W, Horikoshi N, et al.  
606 Cancer-associated mutations of histones H2B, H3.1 and H2A.Z.1 affect the structure  
607 and stability of the nucleosome. *Nucleic Acids Res*. 2018;46(19):10007-18.
- 608 19. Stroud H, Otero S, Desvoyes B, Ramírez-Parra E, Jacobsen SE, Gutierrez C.  
609 Genome-wide analysis of histone H3.1 and H3.3 variants in *Arabidopsis thaliana*.  
610 *Proc Natl Acad Sci U S A*. 2012;109(14):5370-5.
- 611 20. Bremer HD, Lattwein E, Renneker S, Lilliehook I, Ronnelid J, Hansson-Hamlin  
612 H. Identification of specific antinuclear antibodies in dogs using a line immunoassay  
613 and enzyme-linked immunosorbent assay. *Vet Immunol Immunopathol*.  
614 2015;168(3-4):233-41.

- 615 21. Goggs R. Effect of sample type on plasma concentrations of cell-free DNA and  
616 nucleosomes in dogs. *Vet Rec Open*. 2019;6(1):e000357.
- 617 22. Lo Re O, Maugeri A, Hruskova J, Jakubik J, Kucera J, Bienertova-Vasku J, et al.  
618 Obesity-induced nucleosome release predicts poor cardio-metabolic health. *Clin*  
619 *Epigenetics*. 2019;12(1):2.
- 620 23. Kaluarachchi M, Boulange CL, Karaman I, Lindon JC, Ebbels TMD, Elliott P, et  
621 al. A comparison of human serum and plasma metabolites using untargeted (1)H  
622 NMR spectroscopy and UPLC-MS. *Metabolomics*. 2018;14(3):32.
- 623 24. Lima-Oliveira G, Monneret D, Guerber F, Guidi GC. Sample management for  
624 clinical biochemistry assays: Are serum and plasma interchangeable specimens? *Crit*  
625 *Rev Clin Lab Sci*. 2018;55(7):480-500.
- 626 25. Grinstein S, Klip A. Calcium homeostasis and the activation of calcium  
627 channels in cells of the immune system. *Bull N Y Acad Med*. 1989;65(1):69-79.
- 628 26. Kolarevic A, Yancheva D, Kocic G, Smelcerovic A. Deoxyribonuclease  
629 inhibitors. *Eur J Med Chem*. 2014;88:101-11.
- 630 27. McShine RL, Sibinga S, Brozovic B. Differences between the effects of EDTA  
631 and citrate anticoagulants on platelet count and mean platelet volume. *Clin Lab*  
632 *Haematol*. 1990;12(3):277-85.
- 633 28. Clausen FB, Barrett AN, Advani HV, Choolani M, Dziegiel MH. Impact of long-  
634 term storage of plasma and cell-free DNA on measured DNA quantity and fetal  
635 fraction. *Vox Sang*. 2020.
- 636 29. Weinman M. The Role of Tumor-Derived Exosomes in the Development of  
637 Carboplatin  
638 Resistance in Canine Osteosarcoma.: Oregon State University; 2019.
- 639 30. Li W, Tang R, Ma F, Ouyang S, Liu Z, Wu J. Folic acid supplementation alters  
640 the DNA methylation profile and improves insulin resistance in high-fat-diet-fed  
641 mice. *J Nutr Biochem*. 2018;59:76-83.
- 642 31. Perez S, Finamor I, Marti-Andres P, Pereda J, Campos A, Domingues R, et al.  
643 Role of obesity in the release of extracellular nucleosomes in acute pancreatitis: a  
644 clinical and experimental study. *Int J Obes (Lond)*. 2019;43(1):158-68.
- 645 32. Letendre JA, Goggs R. Measurement of plasma cell-free DNA concentrations  
646 in dogs with sepsis, trauma, and neoplasia. *J Vet Emerg Crit Care (San Antonio)*.  
647 2017;27(3):307-14.
- 648 33. Tagawa M, Shimbo G, Inokuma H, Miyahara K. Quantification of plasma cell-  
649 free DNA levels in dogs with various tumors. *J Vet Diagn Invest*. 2019;31(6):836-43.  
650

# Median Nucleosome Levels in Serum

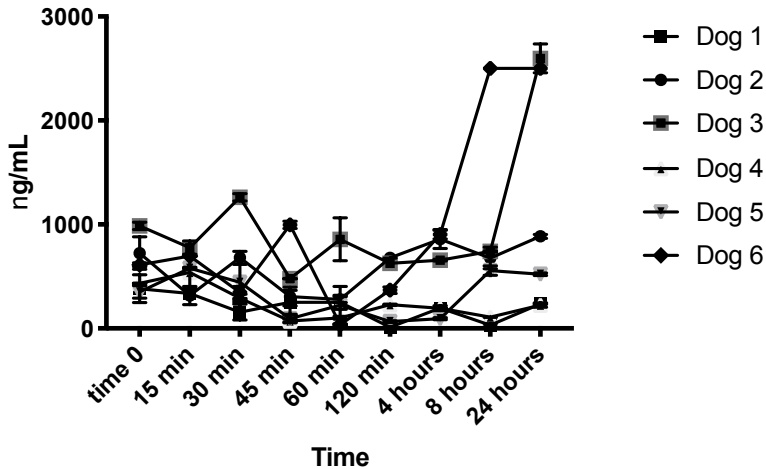

# Serum Correlation with Time 0

bioRxiv preprint doi: <https://doi.org/10.1101/2020.07.08.193466>; this version posted July 9, 2020. The copyright holder for this preprint (which was not certified by peer review) is the author/funder, who has granted bioRxiv a license to display the preprint in perpetuity. It is made available under aCC-BY-NC-ND 4.0 International license.

Pearson's Correlation

1.00  
0.75  
0.50  
0.25  
0.00

time 0

15 min

30 min

45 min

60 min

120 min

4 hours

8 hours

24 hours

Time

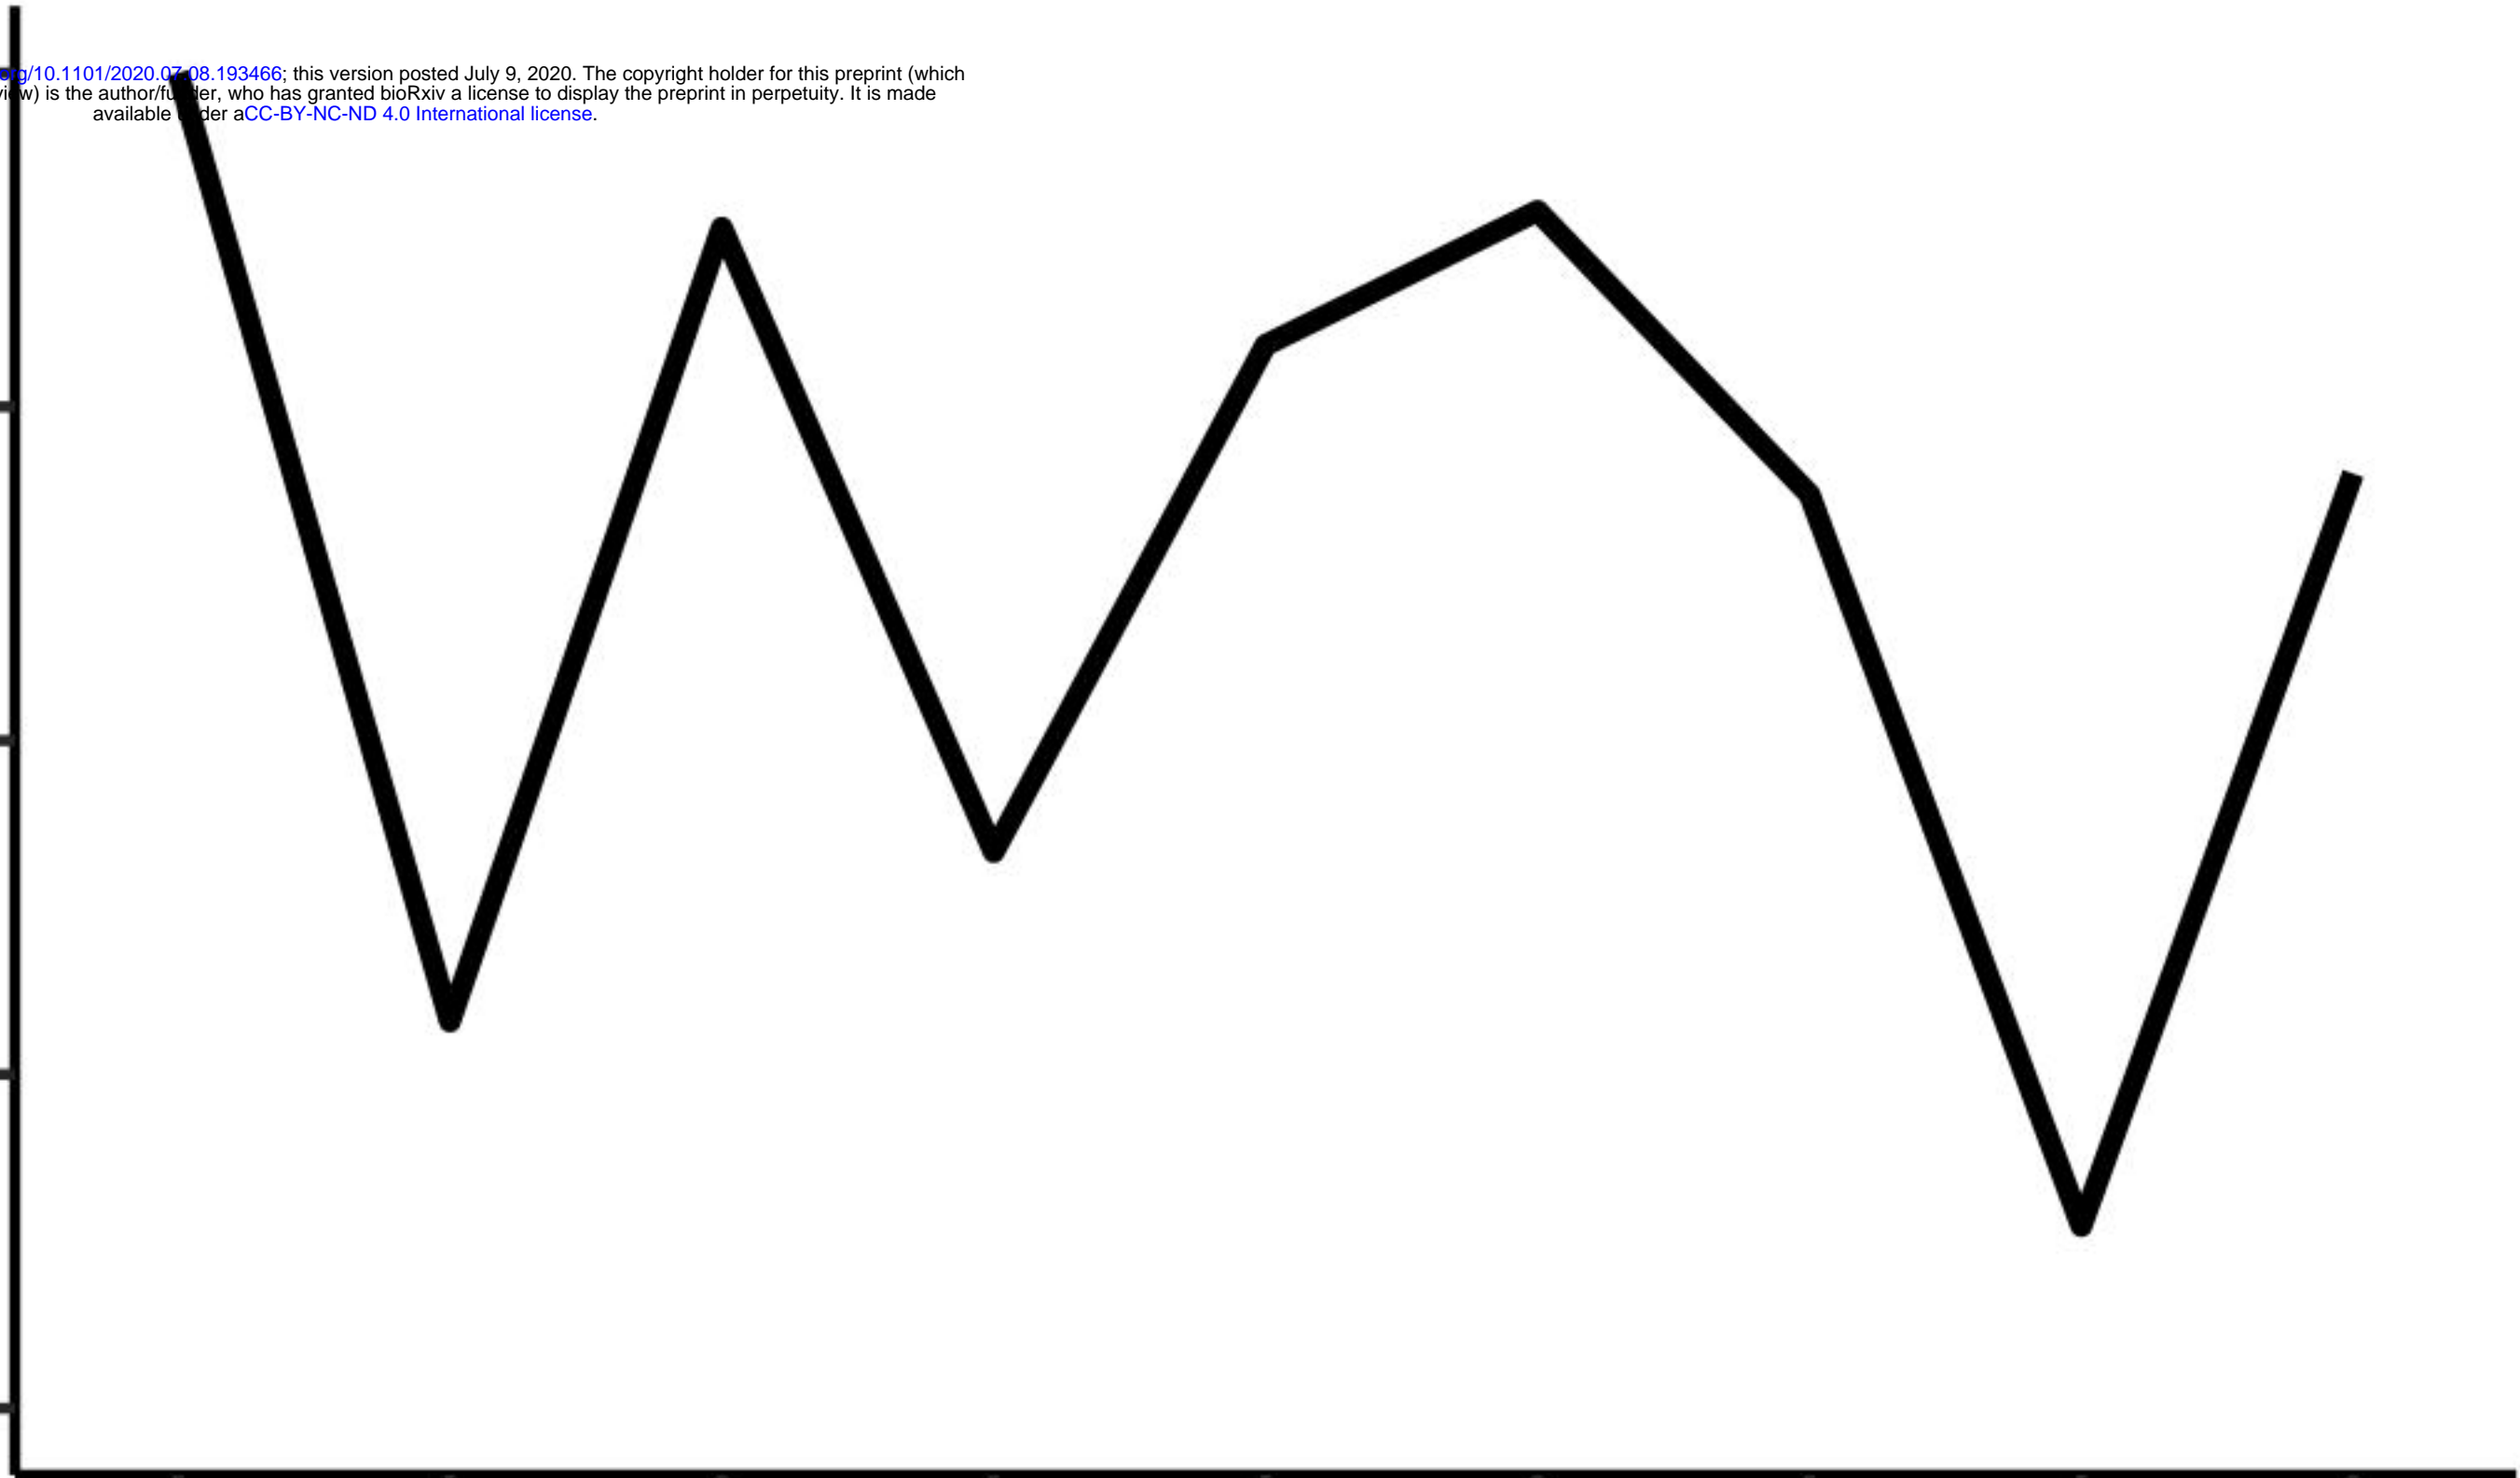

# Median Nucleosome Levels in Plasma

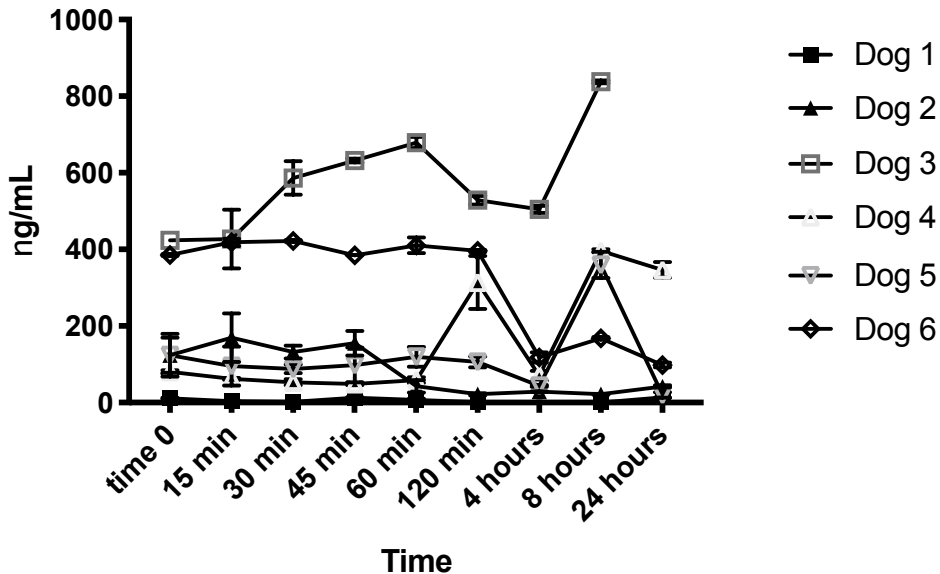

# Plasma Correlation with Time 0

bioRxiv preprint doi: <https://doi.org/10.1101/2020.07.08.193466>; this version posted July 9, 2020. The copyright holder for this preprint (which was not certified by peer review) is the author/funder, who has granted bioRxiv a license to display the preprint in perpetuity. It is made available under aCC-BY-NC-ND 4.0 International license.

Pearson's Correlation

1.00  
0.75  
0.50  
0.25  
0.00

time 0

15 min

30 min

45 min

60 min

120 min

4 hours

8 hours

24 hours

Time

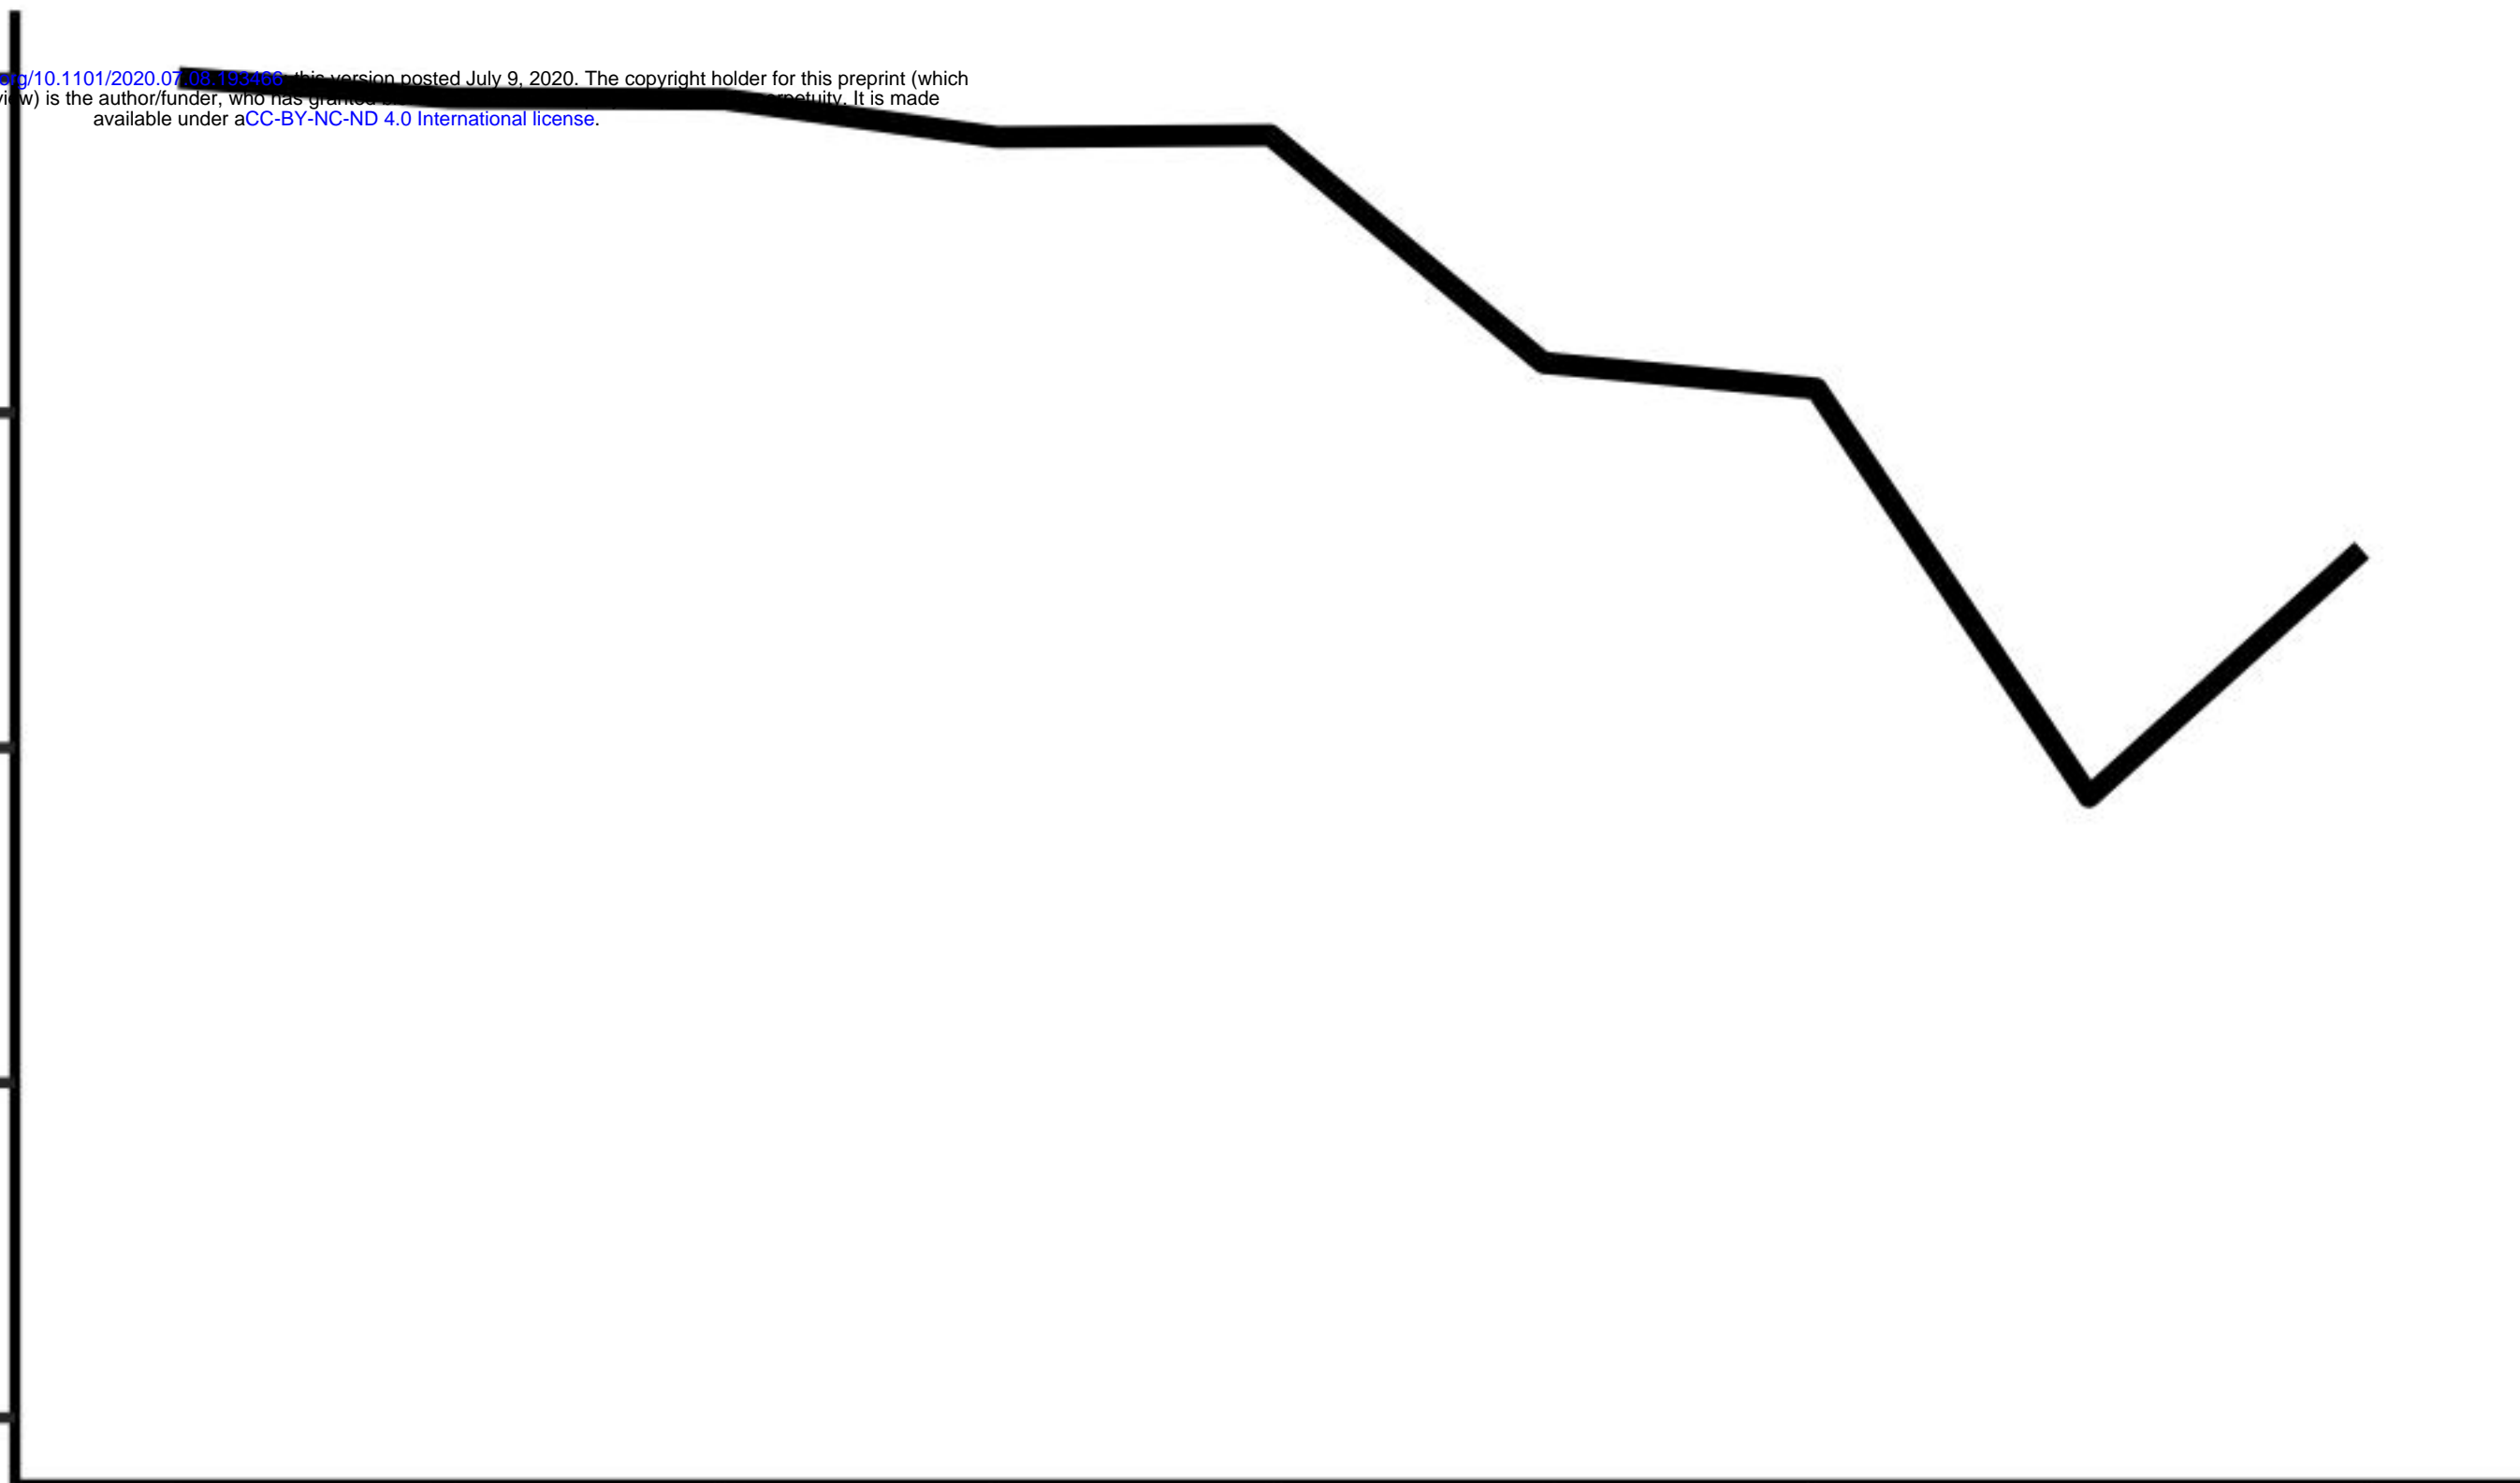

# H3.1 Plasma concentration

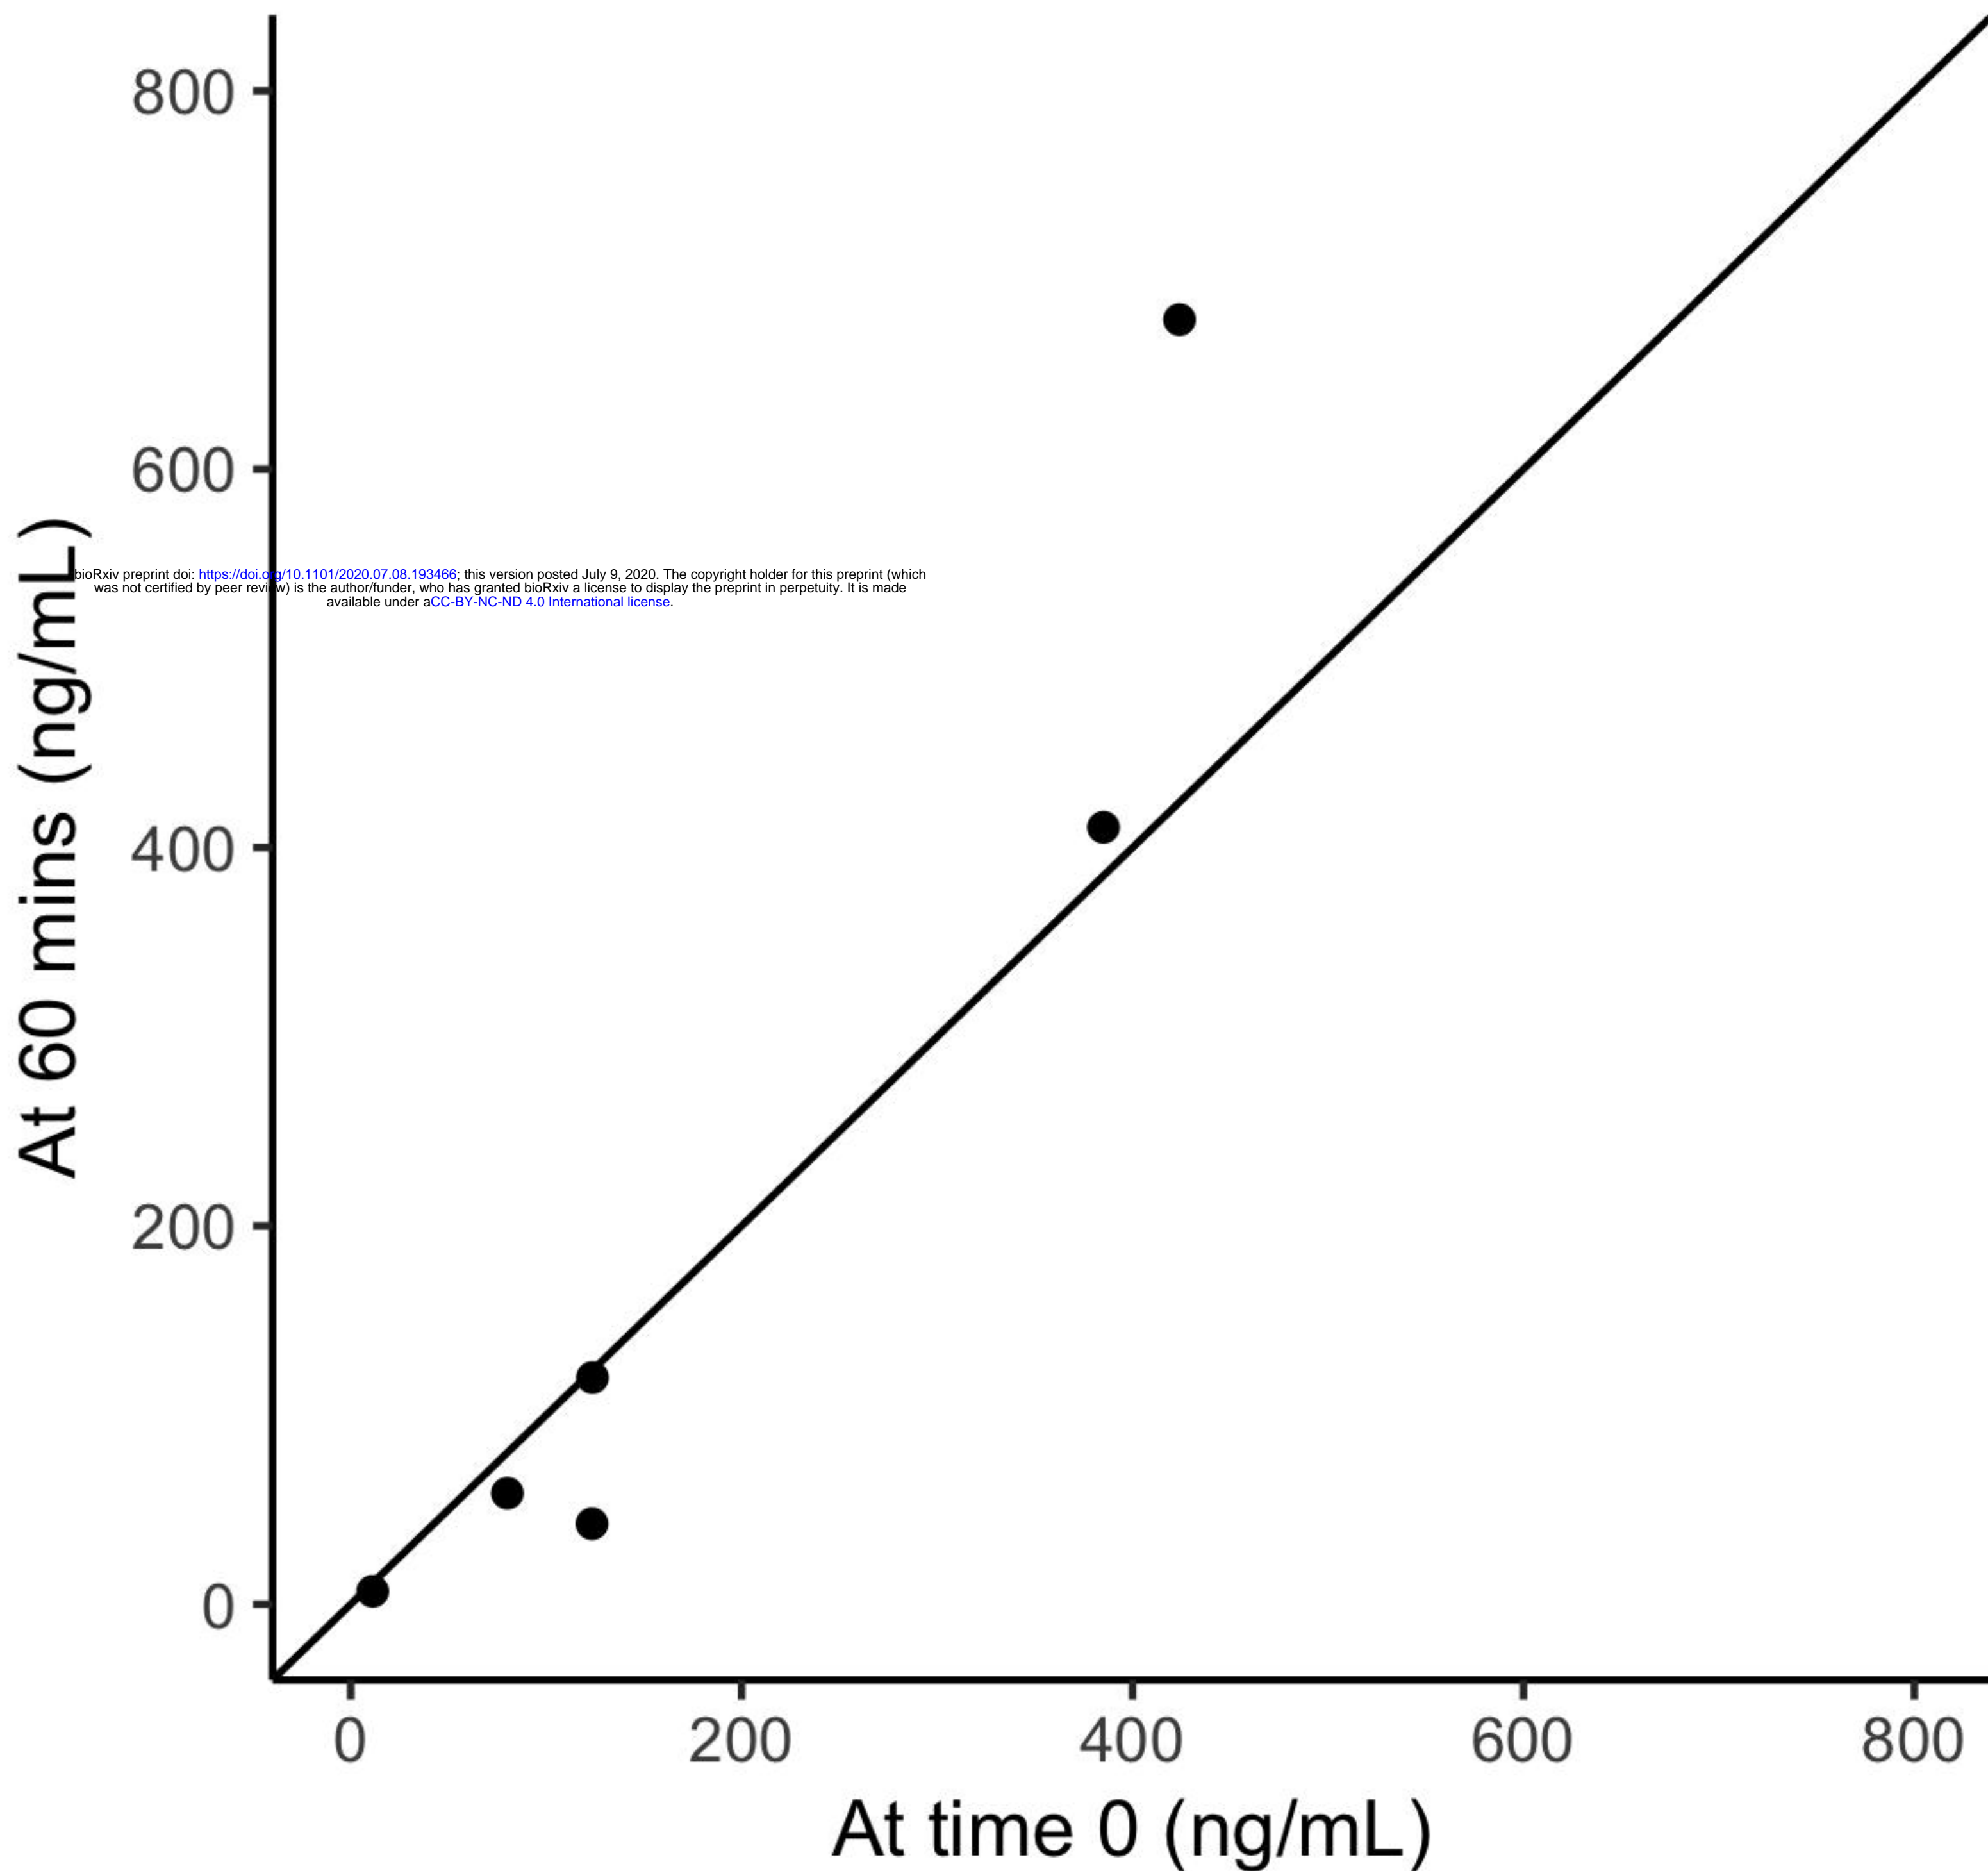



# H3.1 Plasma concentration

At 15 mins (ng/mL)

At time 0 (ng/mL)

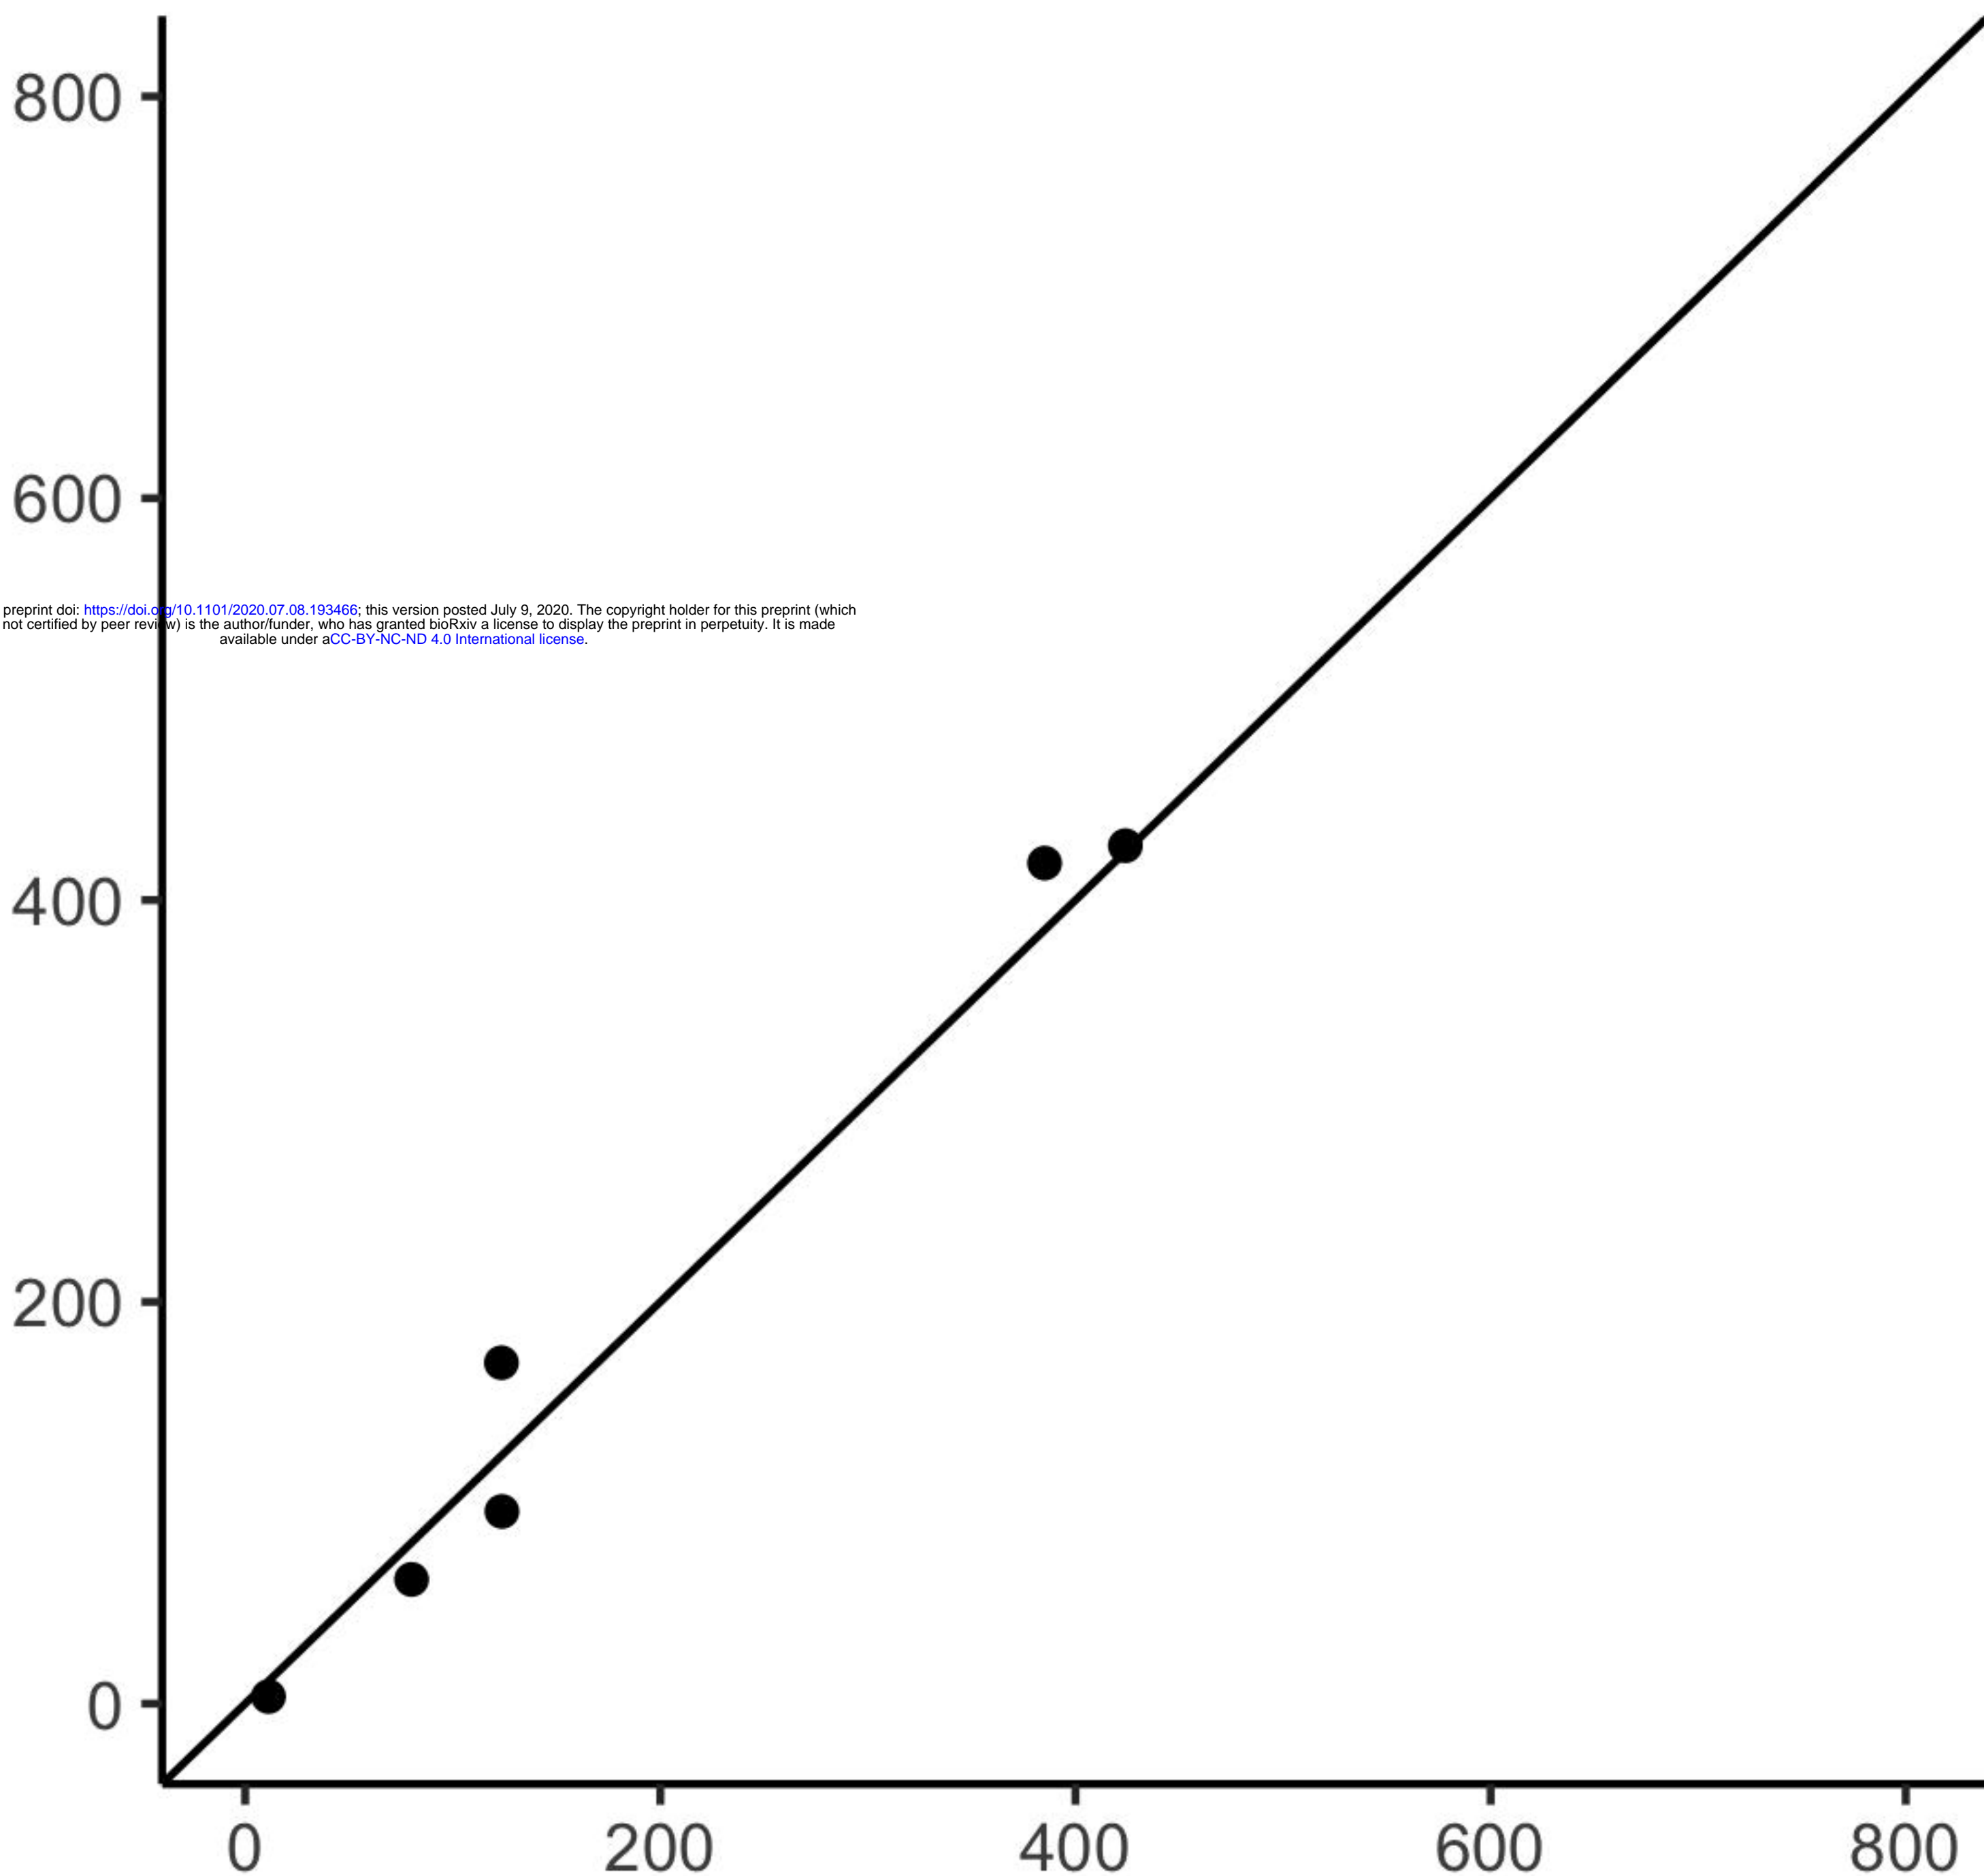

bioRxiv preprint doi: <https://doi.org/10.1101/2020.07.08.193466>; this version posted July 9, 2020. The copyright holder for this preprint (which was not certified by peer review) is the author/funder, who has granted bioRxiv a license to display the preprint in perpetuity. It is made available under aCC-BY-NC-ND 4.0 International license.

**Median Nucleosome Concentrations  
Serum**

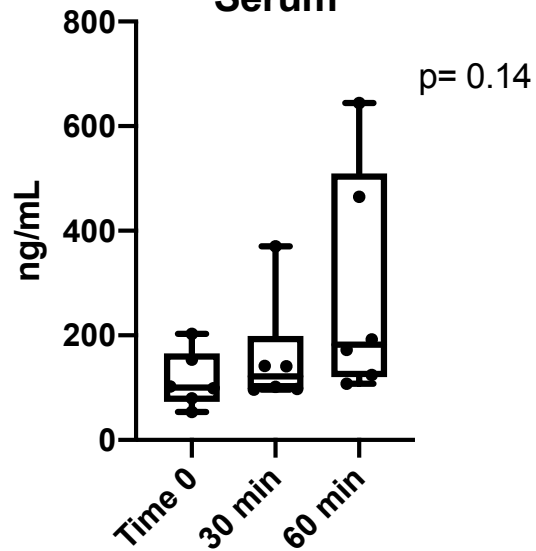

**Median Nucleosome Concentrations  
SST Serum**

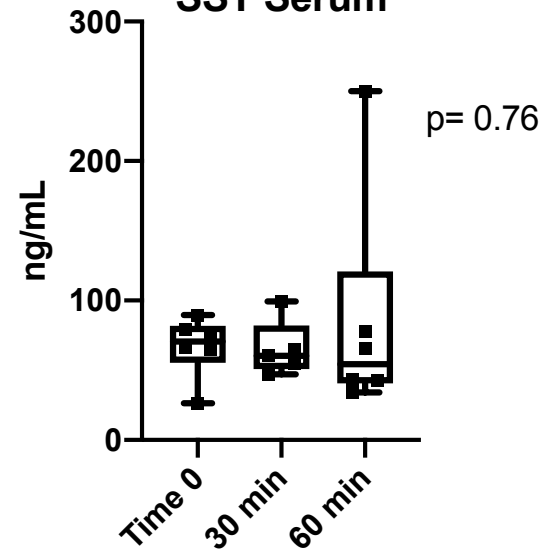

**Median Nucleosome Concentrations  
EDTA Plasma**

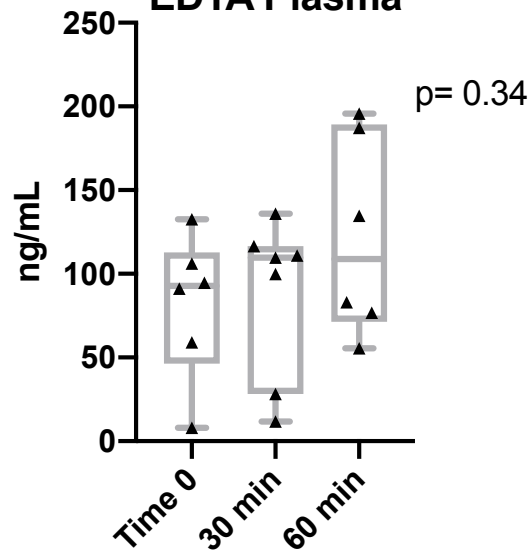

**Median Nucleosome Concentrations  
Citrate Plasma**

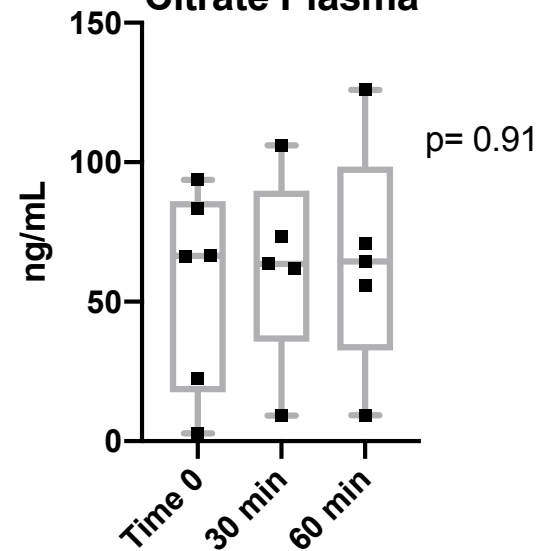

**Median Nucleosome Concentration  
EDTA plasma  
Room Temperature or on Ice**

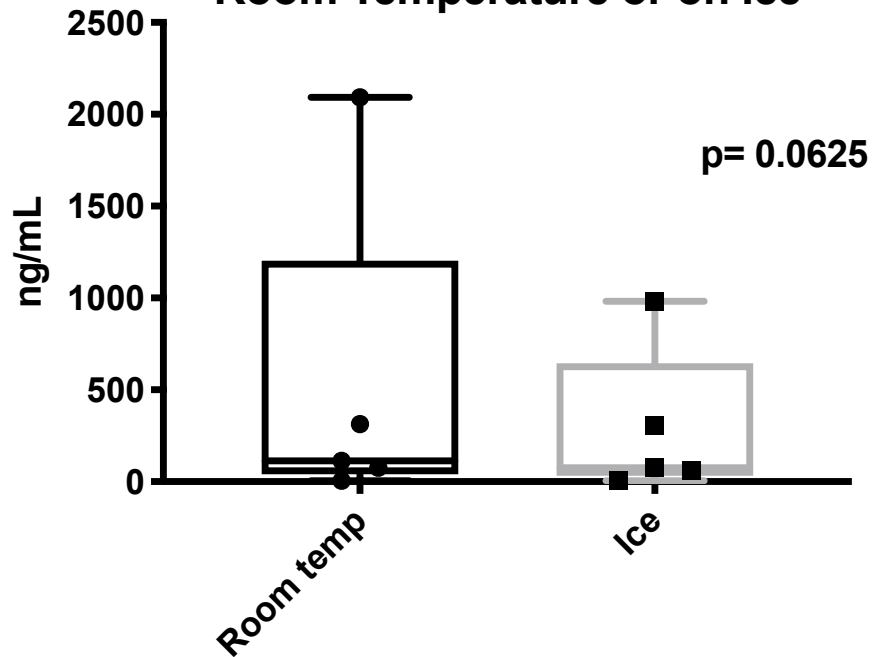

**Median Nucleosome Concentration  
Citrate plasma  
Room Temperature or on Ice**

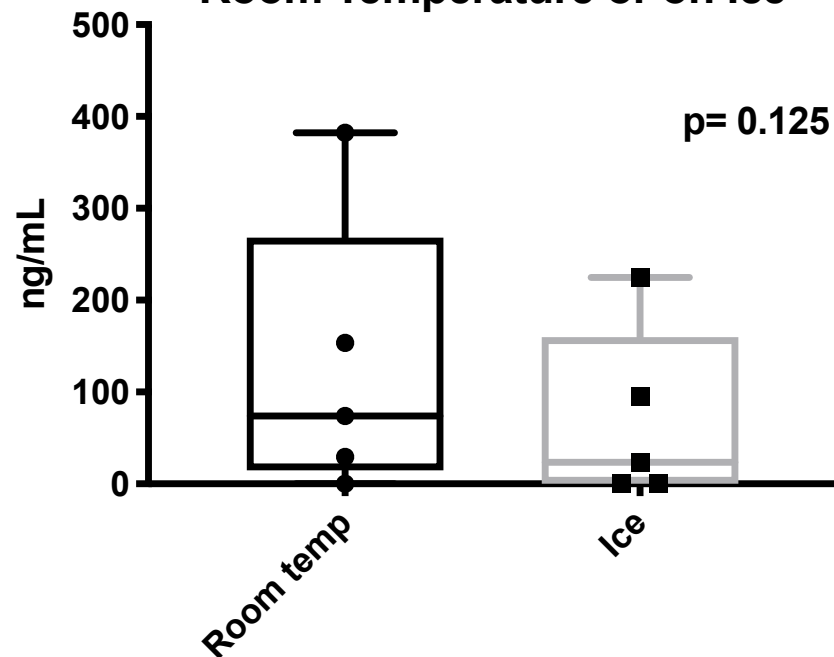

# Effects of Freeze/Thaw Cycles on Nucleosome Concentrations

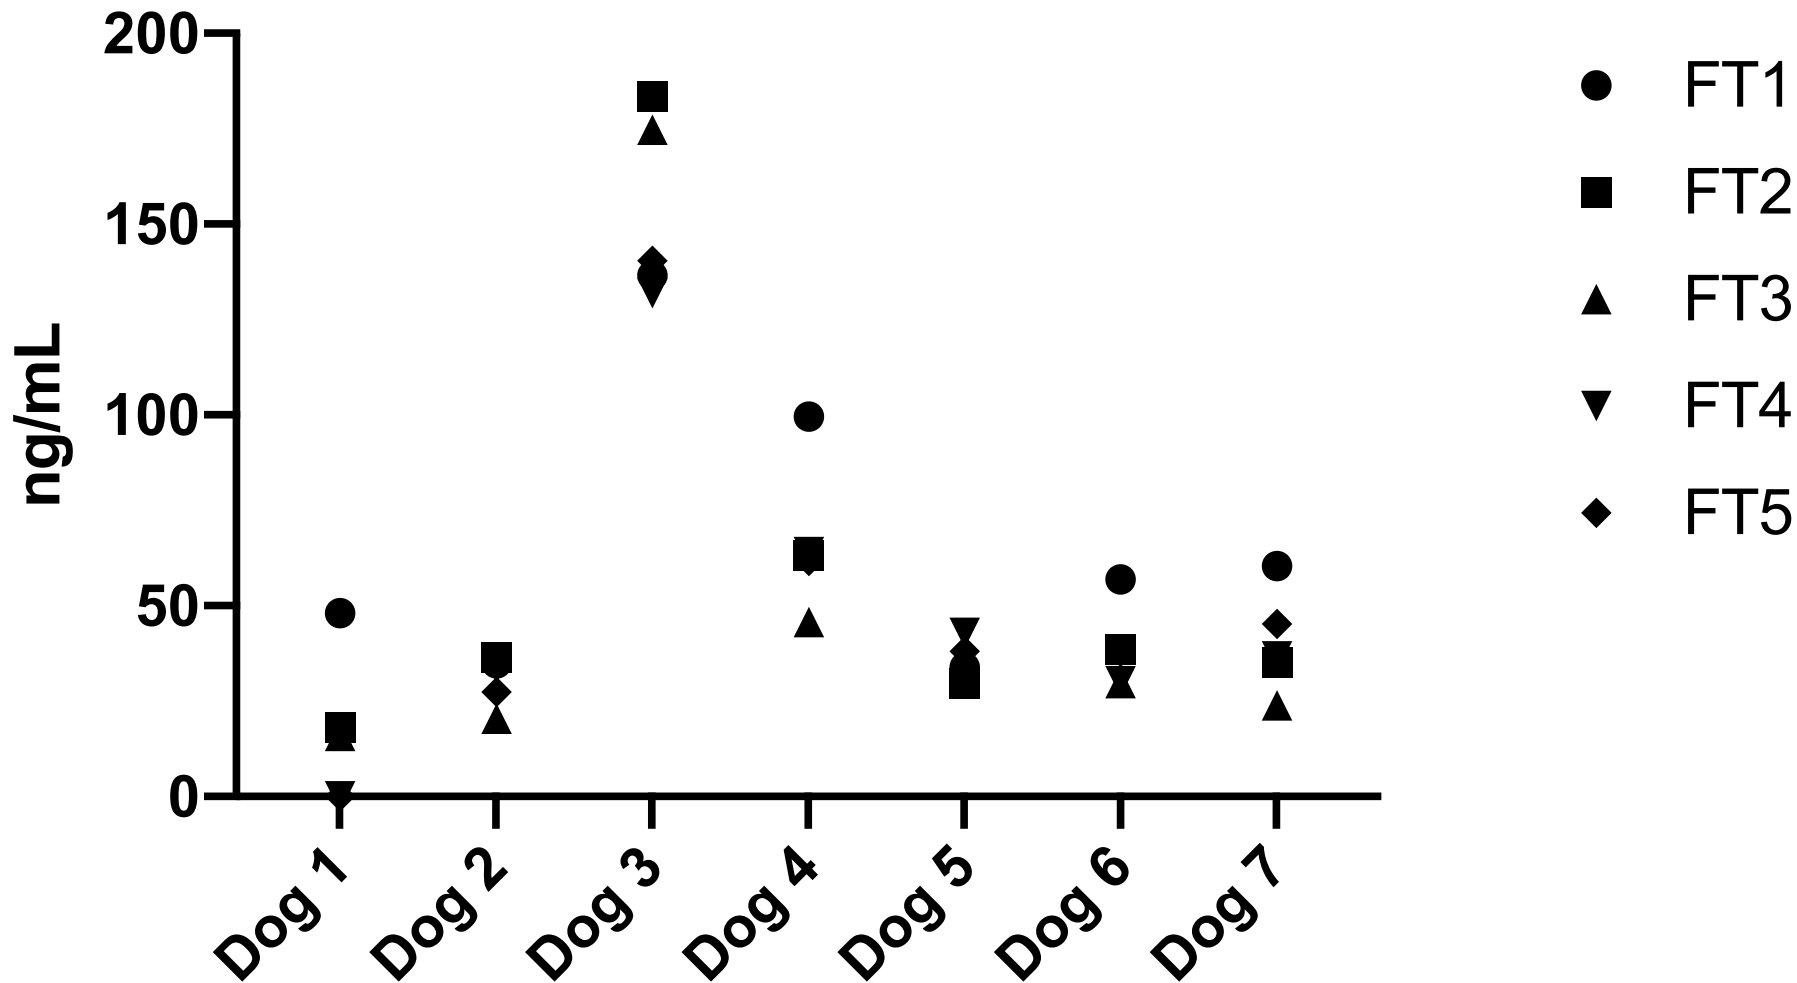

### Median Nucleosome Concentration Fasting vs Fed

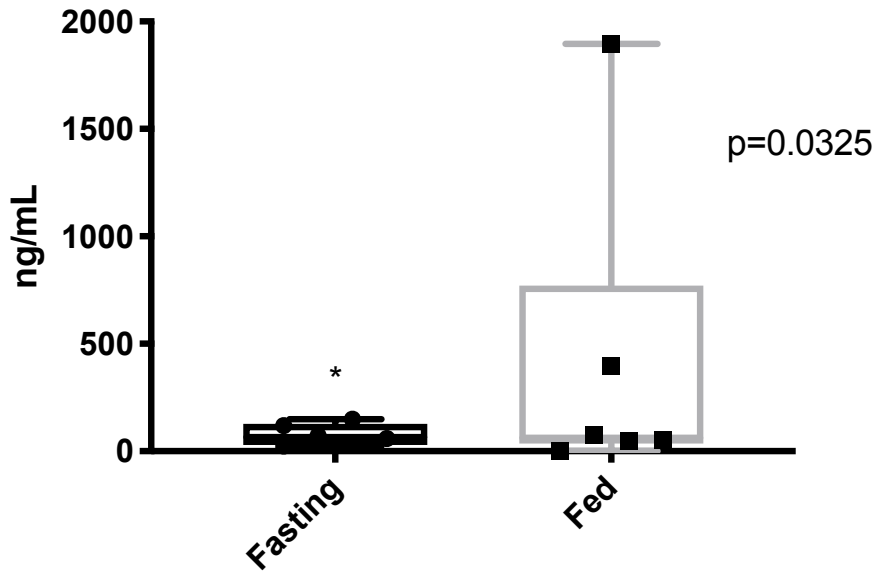

### Mean Nucleosome Concentrations Fasting vs fed individual dogs

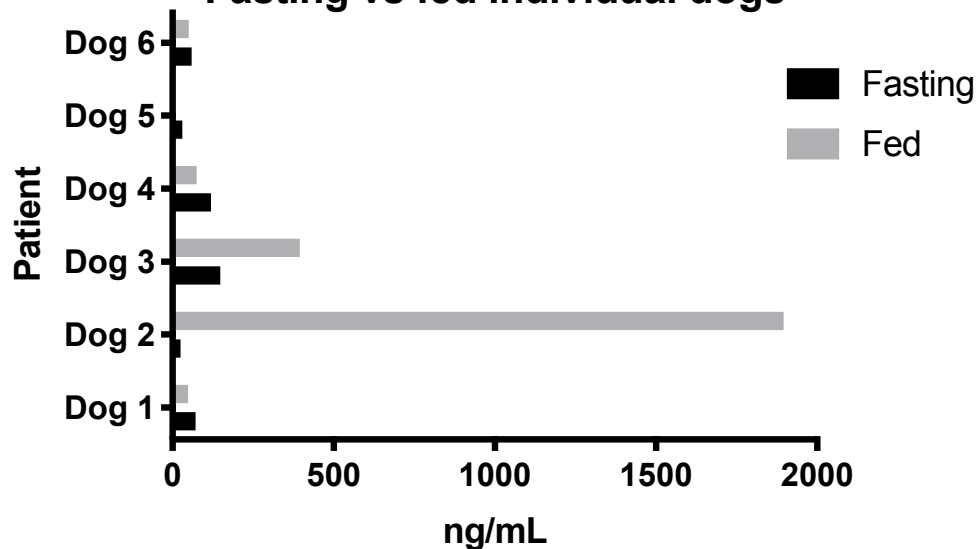

# Mean Nucleosome Concentrations Healthy vs Lymphoma

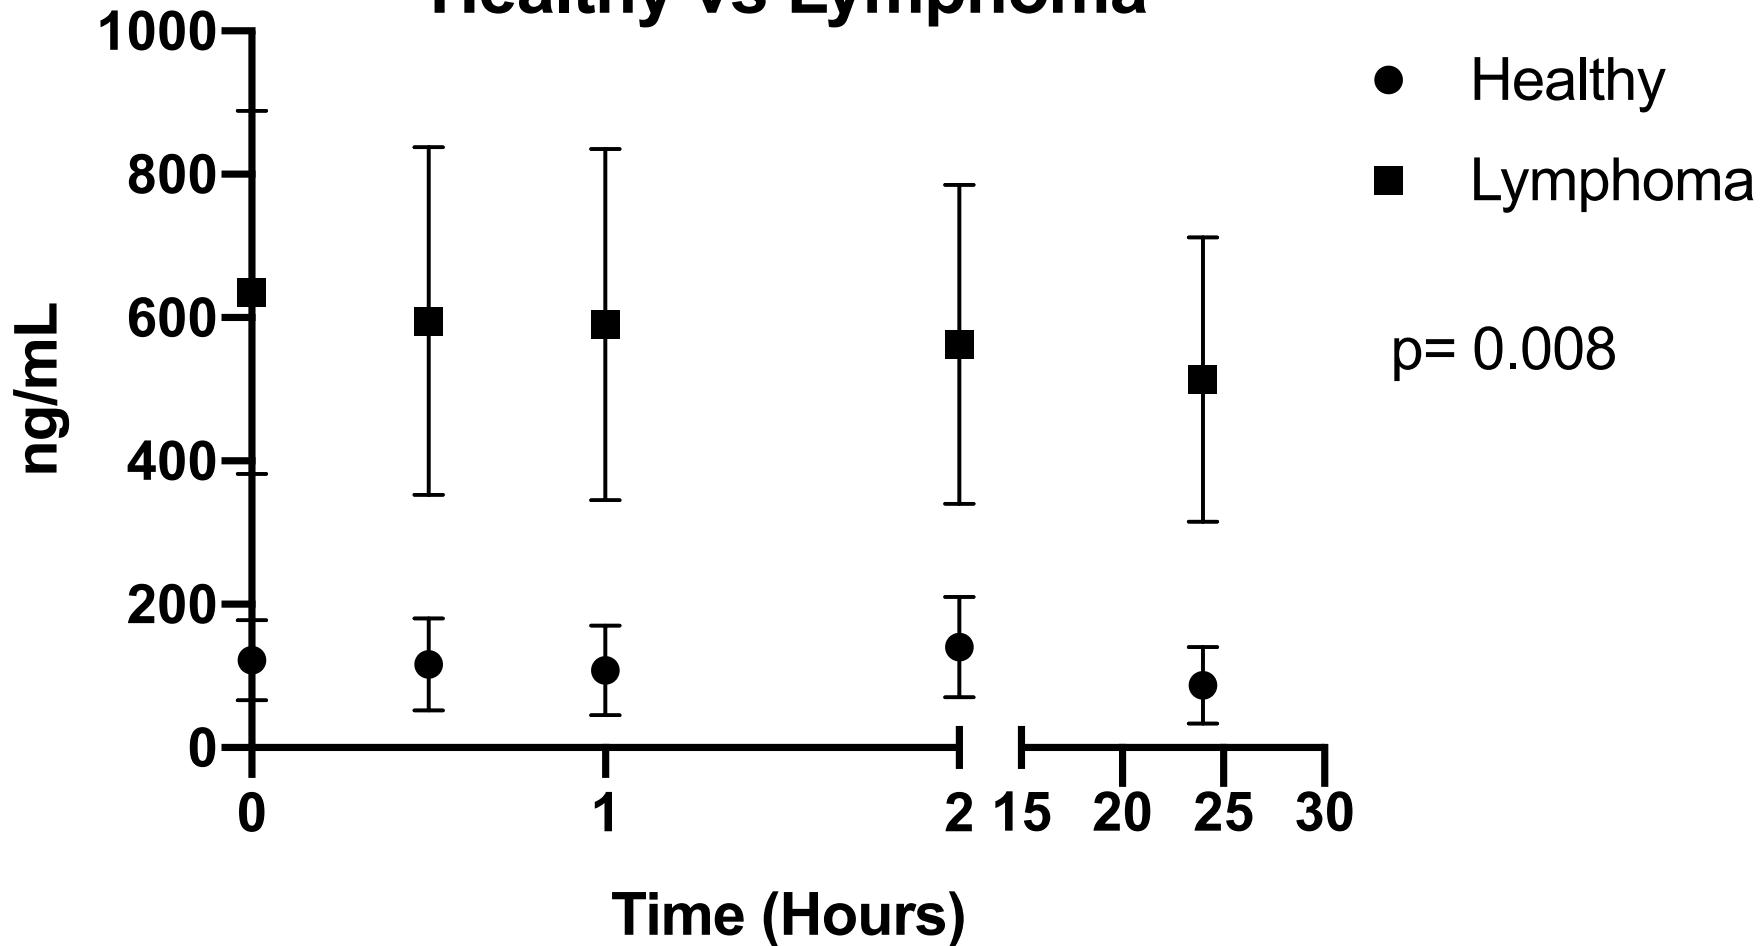

Source: https://biorxiv.org/content/10.1101/2020.07.08.193466v1.full.pdf
